# Supplementary material
Source: PubMed Central journal article supplement (PMC6452693)
Supplement: pnas.1819976116.sapp.pdf [file pnas.1819976116.sapp.pdf]

## Supplementary Information for

Principles of plastid reductive evolution illuminated by non-photosynthetic chrysophytes

Richard G. Dorrell<sup>1+</sup>, Tomonori Azuma<sup>2</sup>, Mami Nomura<sup>2</sup>, Guillemette Audren de Kerdrel<sup>1</sup>, Lucas Paoli<sup>1</sup>, Shanshan Yang<sup>3</sup>, Chris Bowler<sup>1</sup>, Ken-ichiro Ishii<sup>2</sup>, Hideaki Miyashita<sup>2</sup>, Gillian Gile<sup>3</sup>, and Ryoma Kamikawa<sup>2+</sup>

<sup>1</sup>IBENS, Département de Biologie, École Normale Supérieure, CNRS, Inserm, PSL Research University, Paris, France

<sup>2</sup>Graduate School of Human and Environmental Studies, Kyoto University, Kyoto, Japan

<sup>3</sup>School of Life Sciences, Arizona State University, Tempe, United States

Paste corresponding author name here

Email: [dorrell@biologie.ens.fr](mailto:dorrell@biologie.ens.fr) , [kamikawa.ryoma.7v@kyoto-u.ac.jp](mailto:kamikawa.ryoma.7v@kyoto-u.ac.jp)

### **This PDF file includes:**

Figs. S1 to S22

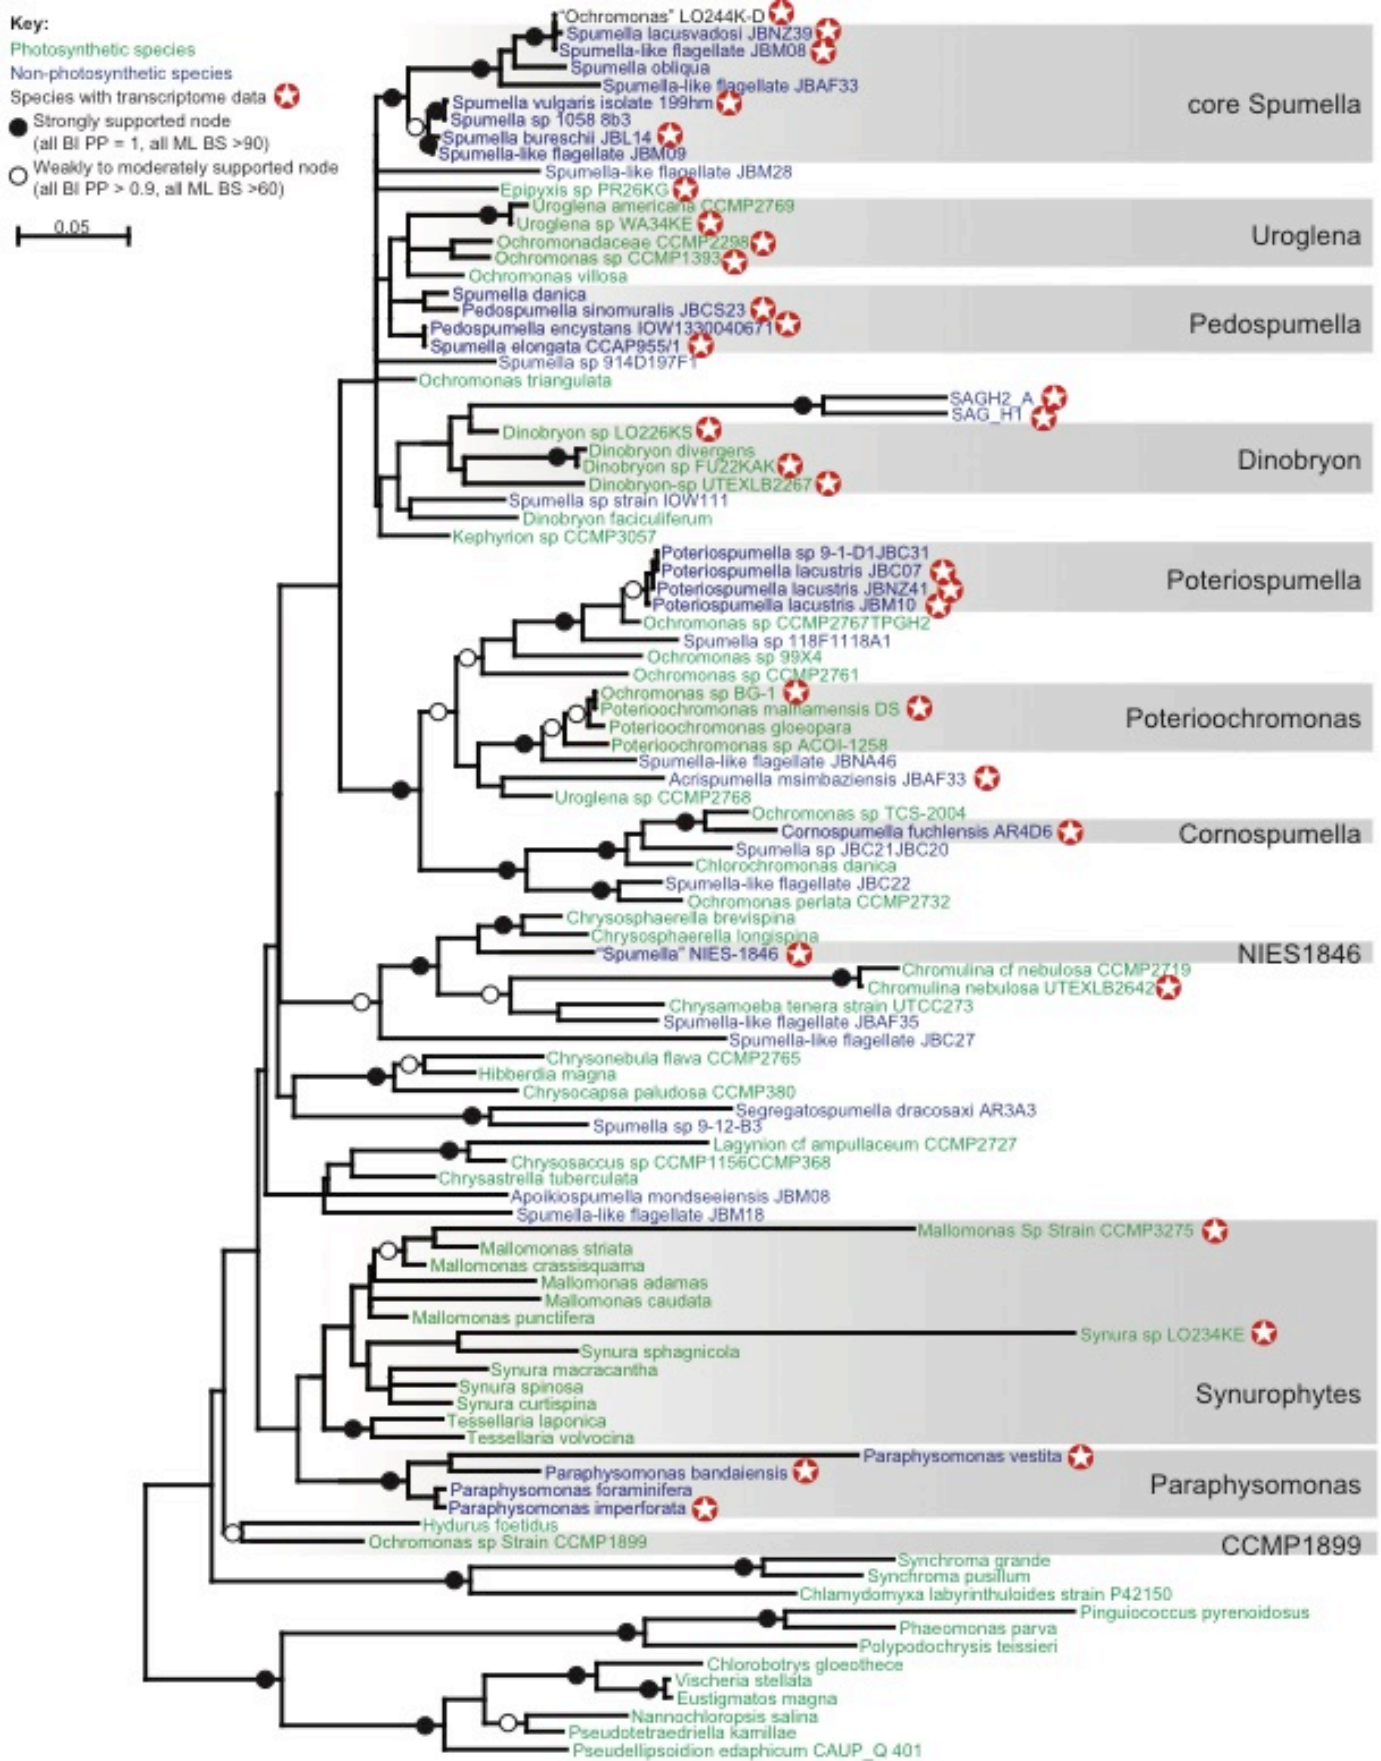

**Fig. S1. Multiple independent losses of photosynthesis in chrysophytes.**

This tree shows the RAxML consensus topology inferred for a 96 taxa alignment of 18S sequences from cultured « PESC clade » members, trimmed to include only sites with >50% (1734 nt), >80% (1619 nt), and >90% (1527 nt) occupancy. The tree topology is artificially rooted between the pinguiphyte/eustigmatophyte/ synchromophyte outgroup, and all chrysophyte sequences. Taxon names are coloured by life-strategy as per fig. 1; taxa with transcriptome or genome sequence data are asterisked; clades corresponding to those in fig. 1 are shaded and labelled.



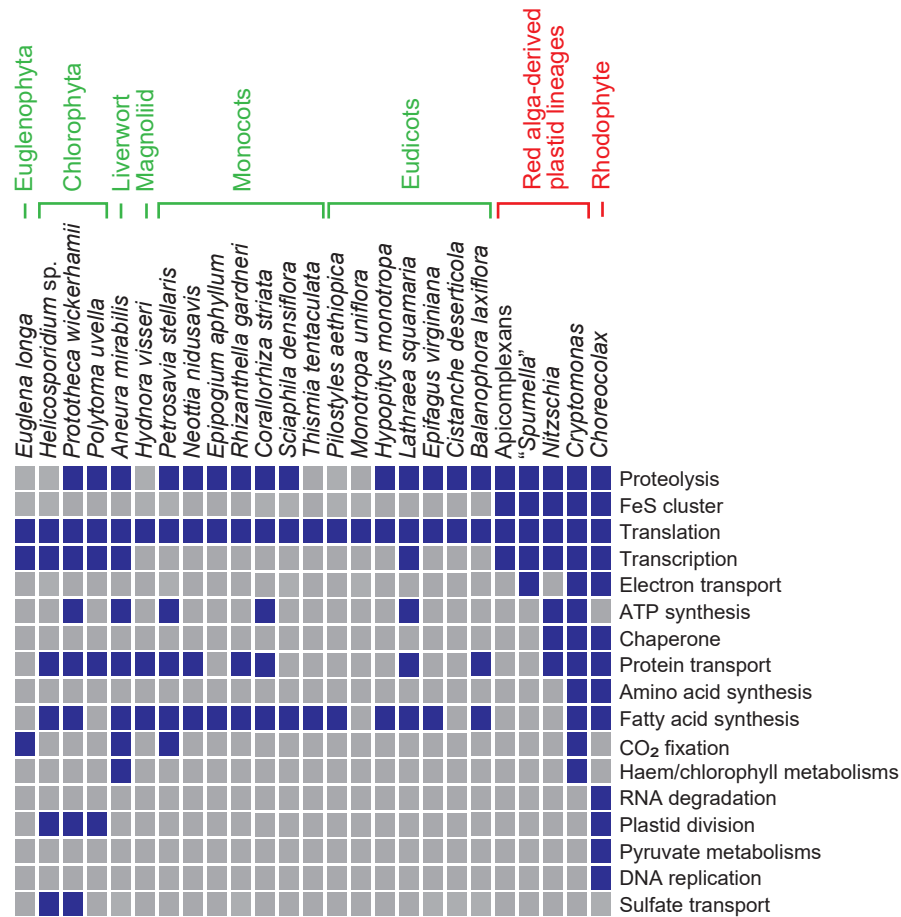

**Fig. S3. Broad comparison of deduced functions encoded in non-photosynthetic plastid genomes.** Data of *Euglena longa*, green algae, plants, and red alga are based on Hadariová et al. (2018) and Su et al. (in press). Red alga-derived plastid lineages are also shown in Fig. 2 panel C. Other details are described in the legend of Fig. 2.

Hadariová L, Vesteg M, Hampl V, Krajčovič J. 2018. Reductive evolution of chloroplasts in non-photosynthetic plants, algae and protists. *Curr Genet* 64:365–387.

Su H, Barkman T, Hao W, Jones SS, Naumann J, Skippington E, Wafula EC, Hu J, Palmer JD, dePamphilis CW. Novel genetic code and record-setting AT-richness in the highly reduced plastid genome of the holoparasitic plant *Balanophora*. *Proc Natl Acad Sci USA* in press

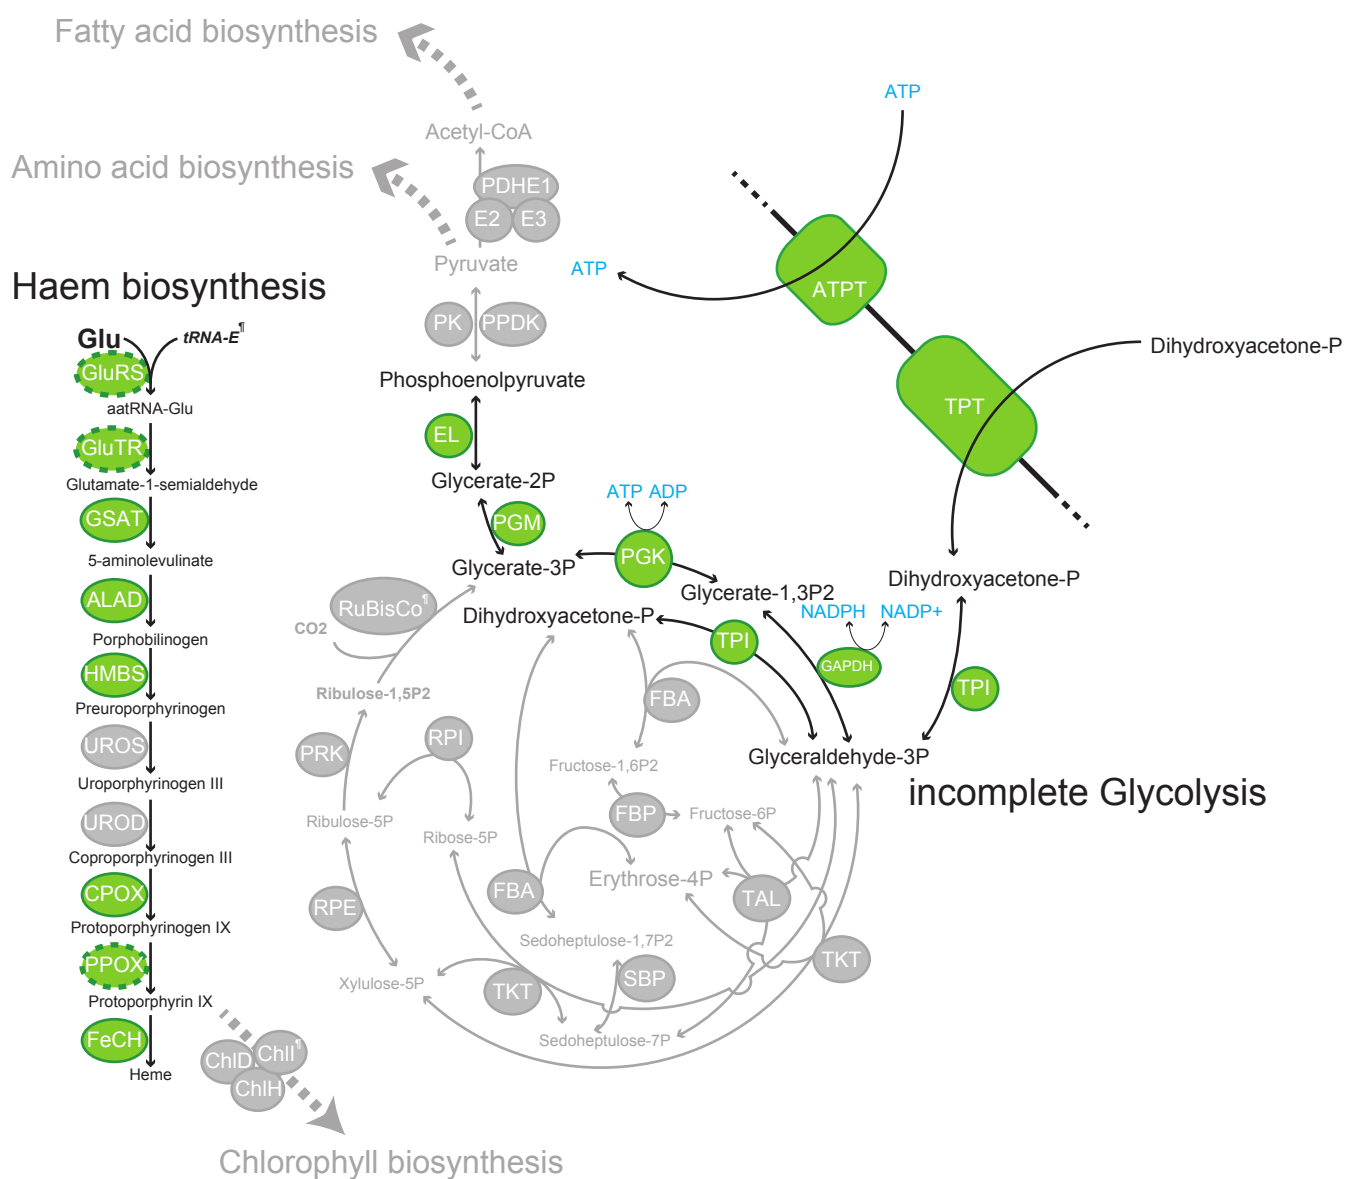

**Fig. S4. Main metabolism of non-photosynthetic plastids in “*Spumella*” sp. NIES-1846.**

Proteins with plastid-targeting signals are shown as closed circles in green. Proteins not found in the transcriptome data are shown in grey. †: plastid genome-encoded proteins. RuBisCO large and small subunits were not present in both plastid genome and transcriptome. ATP/ADP and NADP+/NADPH are highlighted in light blue. EL, enolase; FBA, fructose 1;6-bisphosphate aldolase; FBP, fructose-1,6-bisphosphatase; GAPDH, glyceraldehyde 3-phosphate dehydrogenase; PGK, phosphoglycerate kinase; PGM, phosphoglycerate mutase; PK, pyruvate kinase; PPDK, pyruvate, phosphate dikinase; PRK, phosphoribulokinase; RPE, ribulose 5-phosphate 3-epimerase; RPI, ribose 5-phosphate isomerase; RuBisCO, ribulose 1,5-bisphosphate carboxylase/oxygenase; TAL, transaldolase; TKL, transketolase; TPI, triose phosphate isomerase. PDH, pyruvate dehydrogenase. No metabolic pathway related to chlorophyll, amino acid, and fatty acid biosynthesis are not confidently predicted to locate in the plastids. In contrast, glycolysis and haem biosynthesis are predicted to be located in the plastids. ATP transporter and triose phosphate (TP) transporters are detected in the transcriptome data, indicating the potential of ATP and TP import into the plastids for the plastid metabolic pathways.

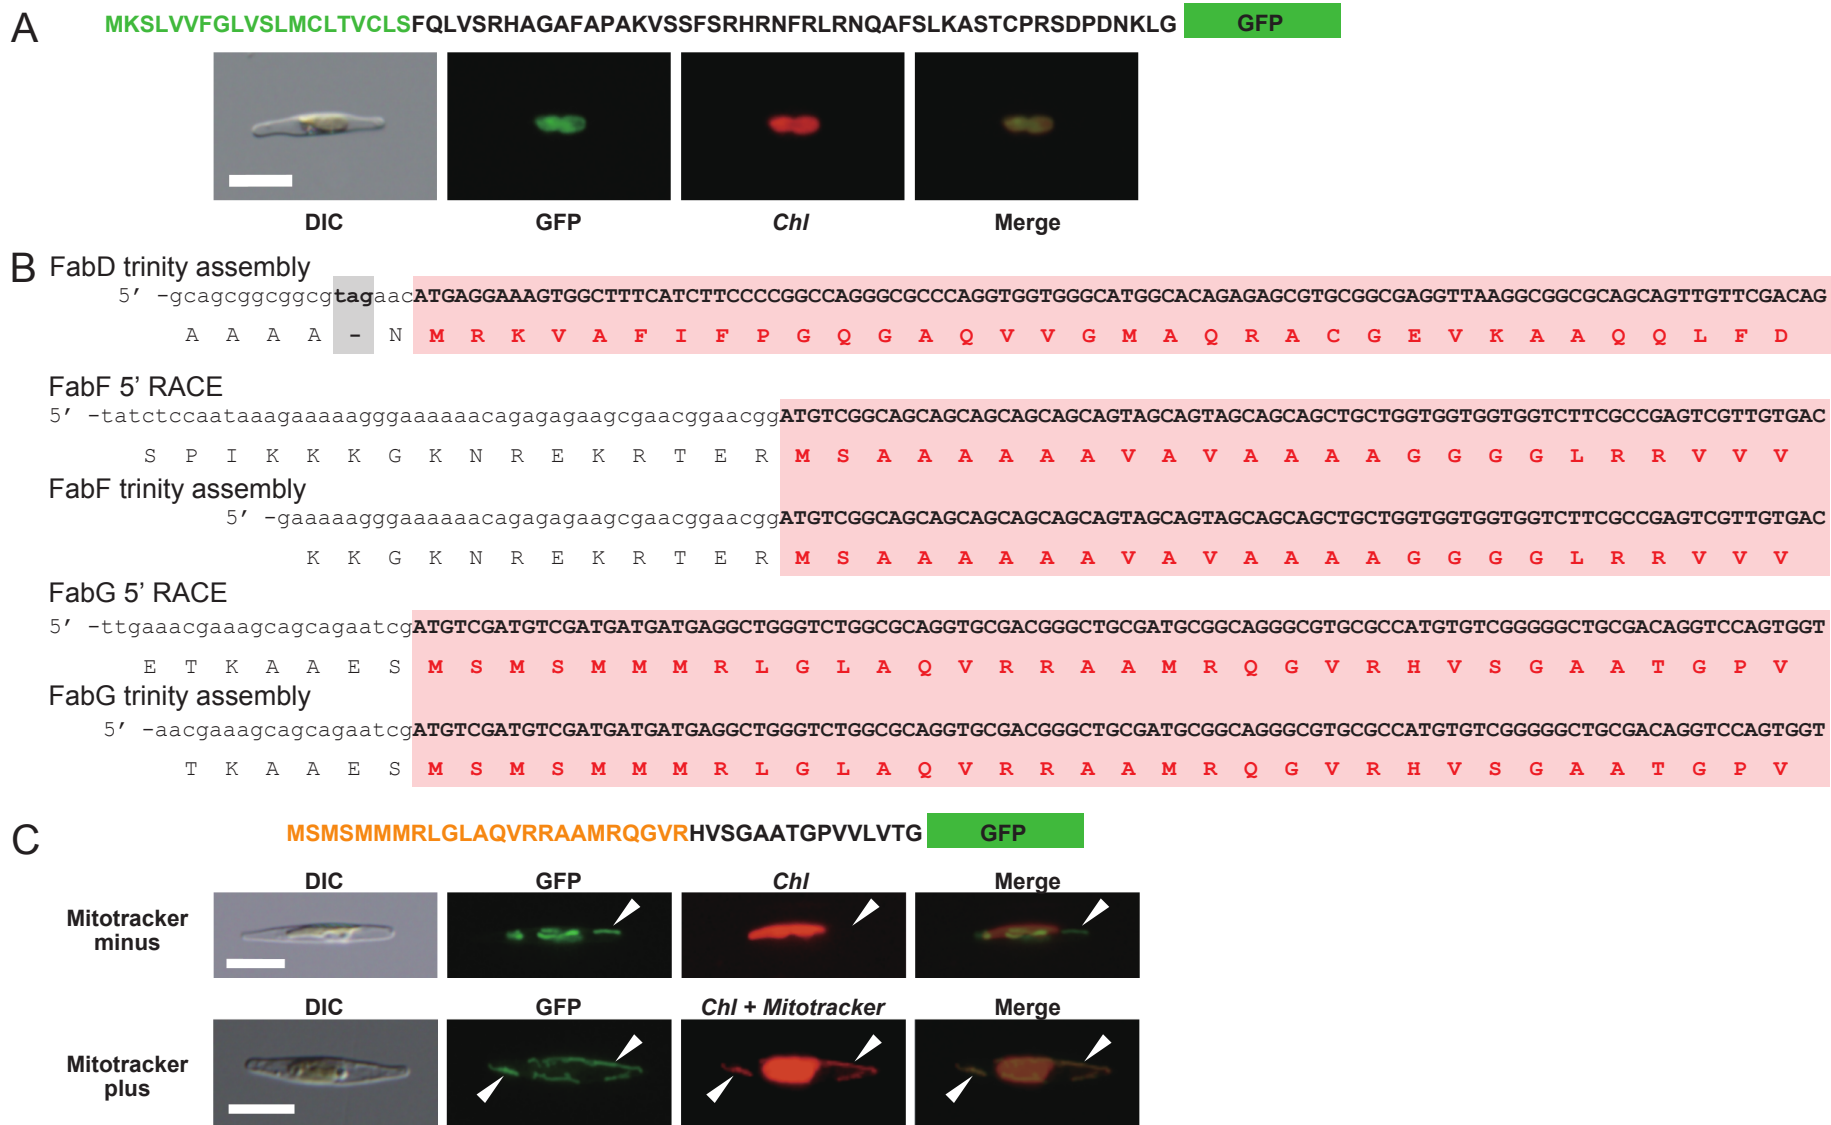

**Fig. S5** Localization of FeCH and three Fab proteins of “*Spumella*” sp. NIES-1846

A. N-terminal amino acid sequence of “*Spumella*” FeCH-GFP recombinant protein and localization in the diatom *Phaeodactylum tricornutum*. GFP fluorescence is co-localized with Chlorophyll fluorescence, indicative of the plastid localization of “*Spumella*” FeCH. The deduced signal peptide is highlighted in green. B. Confirmation of 5' terminal sequences of three fab genes of “*Spumella*” sp. NIES-1846. Deduced coding regions are highlighted in red. In-frame termination codon is highlighted in grey. Given the in-frame termination codon in the 5' UTR region, 5' RACE analysis for fabD was not conducted. The “ATG” codons deduced as the initiation codons here are actually the first methionine codons, confirmed by 5' RACE analyses. This supports that the “*Spumella*” Fab proteins do not have N-terminal plastid targeting signals. C. N-terminal amino acid sequence of “*Spumella*” FabG-GFP recombinant protein and localization in *P. tricornutum*. GFP fluorescence is not co-localized with Chlorophyll fluorescence, but co-localized with Mitotracker fluorescence, indicative of mitochondrial localization of “*Spumella*” FabG. Deduced mitochondrial targeting peptide is highlighted in orange. Bar = 10  $\mu$ m

**A)**

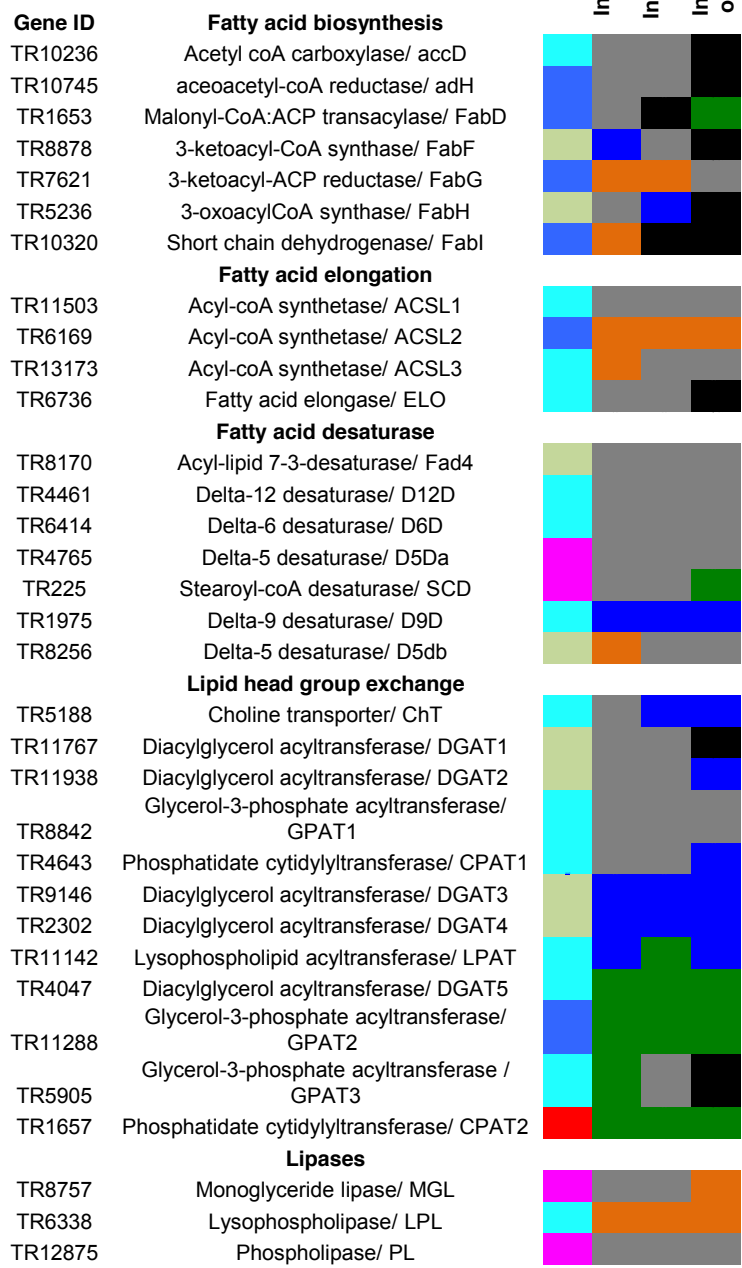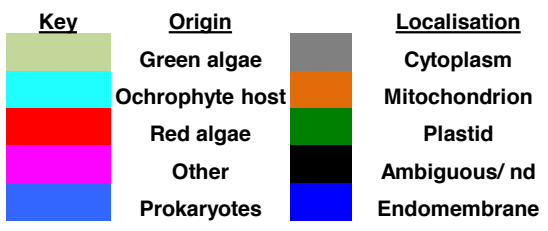

**B)**

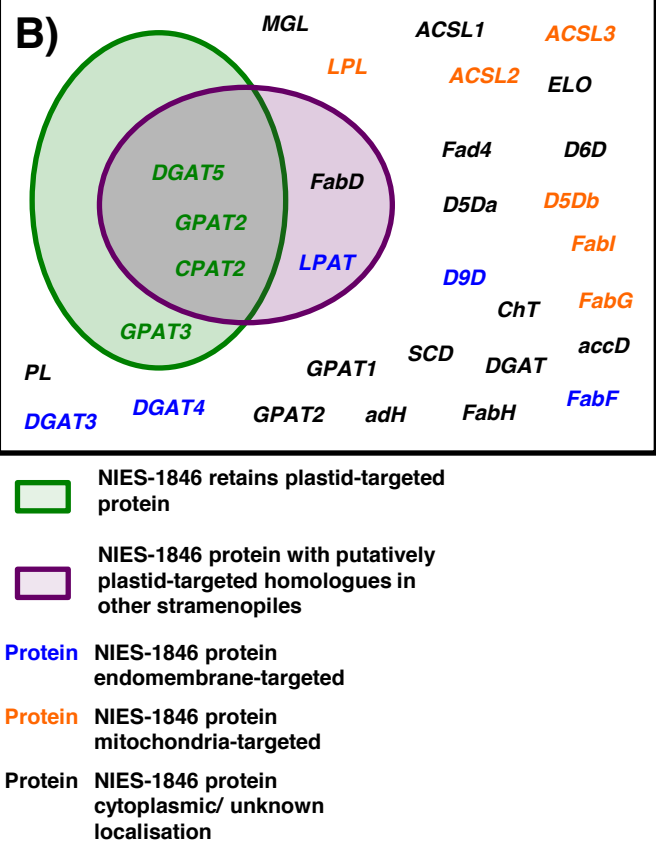

**Fig. S6. Absence of plastid-derived fatty acid synthesis enzymes from « *Spumella* » sp. NIES-1846.** **A:** Heatmap of the evolutionary origin of 33 core lipid metabolism enzymes identified within the NIES-1846 transcriptome. Enzymes were identified by reciprocal BLAST best-hit with threshold evaluate  $1 \times 10^{-05}$  of ochrophyte plastid lipid metabolism proteins identified in Dorrell et al., 2017. The deeper evolutionary origins and localisation of each protein are provided, along with the consensus localisation prediction of the nearest relative of each protein identified from each other PESC clade group shown in Fig. 1; and all stramenopile sequences identified within the top 100 nr BLAST hits. Briefly, these consensus are defined as: *plastid-targeted* if > 20% of the sequences in a particular group have plastid-targeting peptides identifiable using either HECTAR or ASAFind; *mitochondria-targeted* if >20% of the sequences possess mitochondria-targeting peptides identified by a majority of HECTAR, TargetP and MitoFates; *endomembrane* if > 33% of the sequences possess signal peptides identified by a majority of HECTAR, SignalP and TargetP; *cytoplasmic* if none of the above criteria are met; and *ambiguous* if more than one of the criteria are met, or if the group is empty. **B:** Venn diagram summarising the results. « *Spumella* » sp. NIES1846 does not retain enzymes associated with the plastid fatty acid synthesis pathway, with all of the cytoplasmic, mitochondrial and endomembrane-targeted fatty acid synthesis, elongation and desaturation enzymes identified corresponding to enzymes that function in non-plastid compartments in other PESC clade members, and in stramenopiles as a whole.

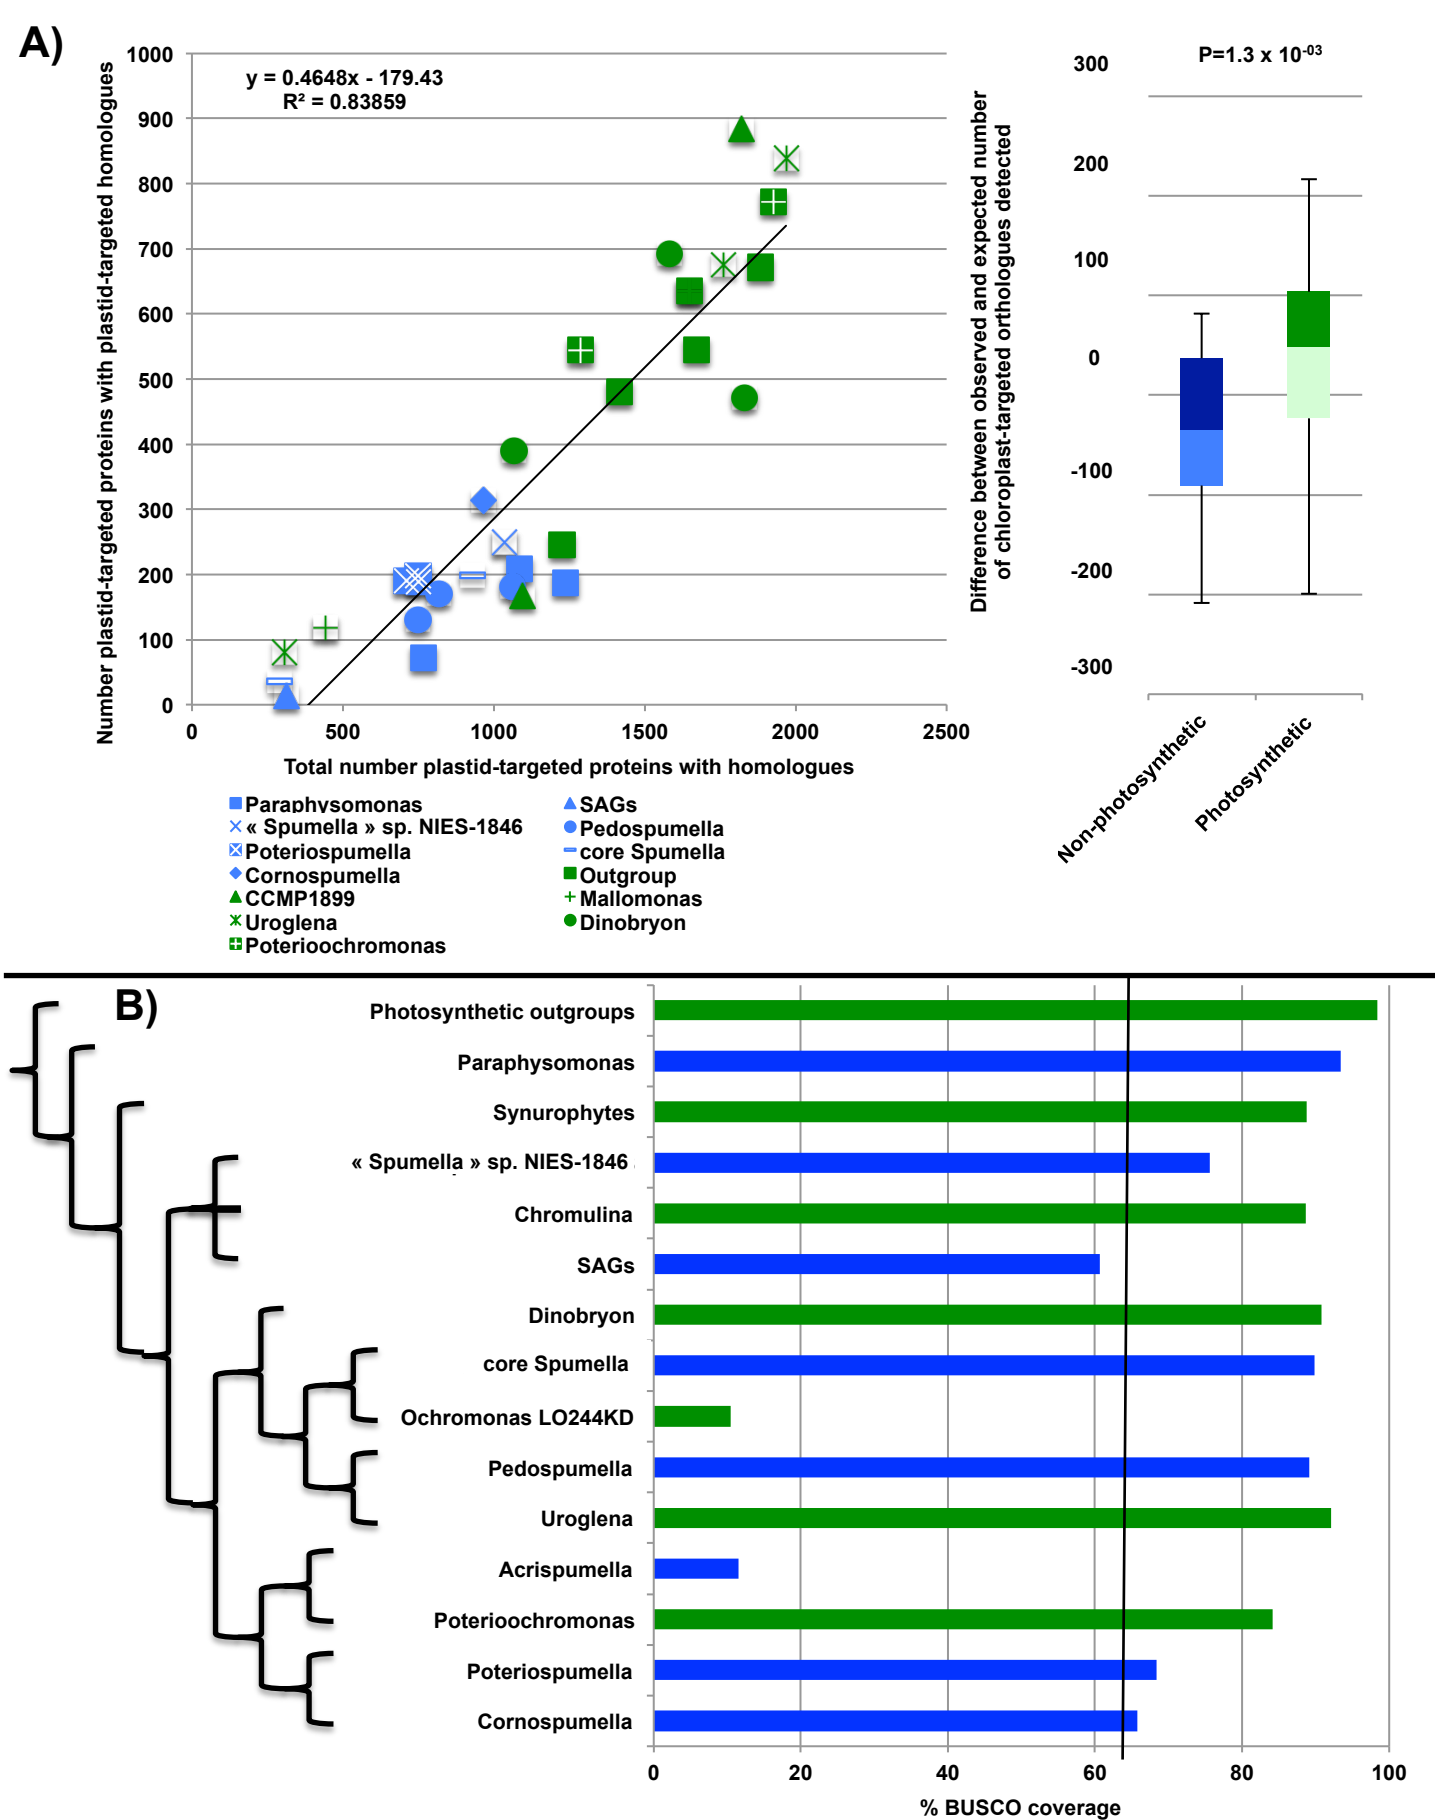

**Fig. S7. Features of published PESC clade transcriptomes. A: (left)** scatterplot showing the number of query plastid-targeted proteins for which any homologue, or a homologue with a defined plastid-targeted sequence, could be identified using BLAST, for all species for which >250 orthologues in total could be found (Text S1) **(right)** boxplot showing the differences in the number of observed homologues with plastid-targeted proteins, and the number expected from linear regression against the total number of homologues, for photosynthetic (blue) and non-photosynthetic species. **B:** the total BUSCO coverage obtained for different groups of photosynthetic (blue) and non-photosynthetic (red) PESC clade species, defined using the topology in fig. 1. The vertical line shows the 65% coverage threshold for comparative plastid proteome analysis.



Fig. S8, panel A

|                                                                                                                                                                                                                                                                                                                                                                                                                                                                                                                                                                                                                                                                                                                                                                                                                                                                                                                                                                                                                                                                                                                                                                                                                                                                                                                                                                                                                                                                                                                                                                                                                                                                                                                                                                                                                                                                                                                                                                                                                                                                                                                                                                                                                                                                                                                                                                                                                              | F                                                                                | R | P | F | R | P | F | R | P | F    | R | P | F                        | R | P | F                  | R | P | F                   | R | P | F                        | R | P | F                     | R | P | F                         | R     | P                   |                          |                                                           |     |                                         |           |                                 |                    |                                                                           |                     |                                                                                  |                                  |                                                   |                       |                                                                      |               |                                                  |                          |                                                                         |          |                              |              |                                                             |           |                                                                     |                |                                                                   |                        |                                                |  |  |  |
|------------------------------------------------------------------------------------------------------------------------------------------------------------------------------------------------------------------------------------------------------------------------------------------------------------------------------------------------------------------------------------------------------------------------------------------------------------------------------------------------------------------------------------------------------------------------------------------------------------------------------------------------------------------------------------------------------------------------------------------------------------------------------------------------------------------------------------------------------------------------------------------------------------------------------------------------------------------------------------------------------------------------------------------------------------------------------------------------------------------------------------------------------------------------------------------------------------------------------------------------------------------------------------------------------------------------------------------------------------------------------------------------------------------------------------------------------------------------------------------------------------------------------------------------------------------------------------------------------------------------------------------------------------------------------------------------------------------------------------------------------------------------------------------------------------------------------------------------------------------------------------------------------------------------------------------------------------------------------------------------------------------------------------------------------------------------------------------------------------------------------------------------------------------------------------------------------------------------------------------------------------------------------------------------------------------------------------------------------------------------------------------------------------------------------|----------------------------------------------------------------------------------|---|---|---|---|---|---|---|---|------|---|---|--------------------------|---|---|--------------------|---|---|---------------------|---|---|--------------------------|---|---|-----------------------|---|---|---------------------------|-------|---------------------|--------------------------|-----------------------------------------------------------|-----|-----------------------------------------|-----------|---------------------------------|--------------------|---------------------------------------------------------------------------|---------------------|----------------------------------------------------------------------------------|----------------------------------|---------------------------------------------------|-----------------------|----------------------------------------------------------------------|---------------|--------------------------------------------------|--------------------------|-------------------------------------------------------------------------|----------|------------------------------|--------------|-------------------------------------------------------------|-----------|---------------------------------------------------------------------|----------------|-------------------------------------------------------------------|------------------------|------------------------------------------------|--|--|--|
|                                                                                                                                                                                                                                                                                                                                                                                                                                                                                                                                                                                                                                                                                                                                                                                                                                                                                                                                                                                                                                                                                                                                                                                                                                                                                                                                                                                                                                                                                                                                                                                                                                                                                                                                                                                                                                                                                                                                                                                                                                                                                                                                                                                                                                                                                                                                                                                                                              | Paraphysomonas                                                                   |   |   |   |   |   |   |   |   | SAGs |   |   | "Spumella" sp. NIES-1846 |   |   | Pedospumella clade |   |   | core Spumella clade |   |   | Acrispumella msimbaensis |   |   | Poteriospumella clade |   |   | Cornospumella fuschlensis |       |                     | Photosynthetic outgroups |                                                           |     | CCMP1899                                |           |                                 | Synurophytes       |                                                                           |                     | Dinobryon/ Epipyxis                                                              |                                  |                                                   | Uroglena clade        |                                                                      |               | Poteriochromonas clade                           |                          |                                                                         |          |                              |              |                                                             |           |                                                                     |                |                                                                   |                        |                                                |  |  |  |
| <b>PHOTOSYNTHETIC METABOLISM</b>                                                                                                                                                                                                                                                                                                                                                                                                                                                                                                                                                                                                                                                                                                                                                                                                                                                                                                                                                                                                                                                                                                                                                                                                                                                                                                                                                                                                                                                                                                                                                                                                                                                                                                                                                                                                                                                                                                                                                                                                                                                                                                                                                                                                                                                                                                                                                                                             |                                                                                  |   |   |   |   |   |   |   |   |      |   |   |                          |   |   |                    |   |   |                     |   |   |                          |   |   |                       |   |   |                           |       |                     |                          |                                                           |     |                                         |           |                                 |                    |                                                                           |                     |                                                                                  |                                  |                                                   |                       |                                                                      |               |                                                  |                          |                                                                         |          |                              |              |                                                             |           |                                                                     |                |                                                                   |                        |                                                |  |  |  |
| <b>1A: LHC PROTEINS</b>                                                                                                                                                                                                                                                                                                                                                                                                                                                                                                                                                                                                                                                                                                                                                                                                                                                                                                                                                                                                                                                                                                                                                                                                                                                                                                                                                                                                                                                                                                                                                                                                                                                                                                                                                                                                                                                                                                                                                                                                                                                                                                                                                                                                                                                                                                                                                                                                      |                                                                                  |   |   |   |   |   |   |   |   |      |   |   |                          |   |   |                    |   |   |                     |   |   |                          |   |   |                       |   |   |                           |       |                     |                          |                                                           |     |                                         |           |                                 |                    |                                                                           |                     |                                                                                  |                                  |                                                   |                       |                                                                      |               |                                                  |                          |                                                                         |          |                              |              |                                                             |           |                                                                     |                |                                                                   |                        |                                                |  |  |  |
| Chlorophyll a/b binding protein                                                                                                                                                                                                                                                                                                                                                                                                                                                                                                                                                                                                                                                                                                                                                                                                                                                                                                                                                                                                                                                                                                                                                                                                                                                                                                                                                                                                                                                                                                                                                                                                                                                                                                                                                                                                                                                                                                                                                                                                                                                                                                                                                                                                                                                                                                                                                                                              |                                                                                  |   |   |   |   |   |   |   |   |      |   |   |                          |   |   |                    |   |   |                     |   |   |                          |   |   |                       |   |   |                           |       |                     |                          |                                                           |     |                                         |           |                                 |                    |                                                                           |                     |                                                                                  |                                  |                                                   |                       |                                                                      |               |                                                  |                          |                                                                         |          |                              |              |                                                             |           |                                                                     |                |                                                                   |                        |                                                |  |  |  |
| HLIP                                                                                                                                                                                                                                                                                                                                                                                                                                                                                                                                                                                                                                                                                                                                                                                                                                                                                                                                                                                                                                                                                                                                                                                                                                                                                                                                                                                                                                                                                                                                                                                                                                                                                                                                                                                                                                                                                                                                                                                                                                                                                                                                                                                                                                                                                                                                                                                                                         |                                                                                  |   |   |   |   |   |   |   |   |      |   |   |                          |   |   |                    |   |   |                     |   |   |                          |   |   |                       |   |   |                           |       |                     |                          |                                                           |     |                                         |           |                                 |                    |                                                                           |                     |                                                                                  |                                  |                                                   |                       |                                                                      |               |                                                  |                          |                                                                         |          |                              |              |                                                             |           |                                                                     |                |                                                                   |                        |                                                |  |  |  |
| LhcA                                                                                                                                                                                                                                                                                                                                                                                                                                                                                                                                                                                                                                                                                                                                                                                                                                                                                                                                                                                                                                                                                                                                                                                                                                                                                                                                                                                                                                                                                                                                                                                                                                                                                                                                                                                                                                                                                                                                                                                                                                                                                                                                                                                                                                                                                                                                                                                                                         |                                                                                  |   |   |   |   |   |   |   |   |      |   |   |                          |   |   |                    |   |   |                     |   |   |                          |   |   |                       |   |   |                           |       |                     |                          |                                                           |     |                                         |           |                                 |                    |                                                                           |                     |                                                                                  |                                  |                                                   |                       |                                                                      |               |                                                  |                          |                                                                         |          |                              |              |                                                             |           |                                                                     |                |                                                                   |                        |                                                |  |  |  |
| LhcF                                                                                                                                                                                                                                                                                                                                                                                                                                                                                                                                                                                                                                                                                                                                                                                                                                                                                                                                                                                                                                                                                                                                                                                                                                                                                                                                                                                                                                                                                                                                                                                                                                                                                                                                                                                                                                                                                                                                                                                                                                                                                                                                                                                                                                                                                                                                                                                                                         |                                                                                  |   |   |   |   |   |   |   |   |      |   |   |                          |   |   |                    |   |   |                     |   |   |                          |   |   |                       |   |   |                           |       |                     |                          |                                                           |     |                                         |           |                                 |                    |                                                                           |                     |                                                                                  |                                  |                                                   |                       |                                                                      |               |                                                  |                          |                                                                         |          |                              |              |                                                             |           |                                                                     |                |                                                                   |                        |                                                |  |  |  |
| LhcR                                                                                                                                                                                                                                                                                                                                                                                                                                                                                                                                                                                                                                                                                                                                                                                                                                                                                                                                                                                                                                                                                                                                                                                                                                                                                                                                                                                                                                                                                                                                                                                                                                                                                                                                                                                                                                                                                                                                                                                                                                                                                                                                                                                                                                                                                                                                                                                                                         |                                                                                  |   |   |   |   |   |   |   |   |      |   |   |                          |   |   |                    |   |   |                     |   |   |                          |   |   |                       |   |   |                           |       |                     |                          |                                                           |     |                                         |           |                                 |                    |                                                                           |                     |                                                                                  |                                  |                                                   |                       |                                                                      |               |                                                  |                          |                                                                         |          |                              |              |                                                             |           |                                                                     |                |                                                                   |                        |                                                |  |  |  |
| LI818                                                                                                                                                                                                                                                                                                                                                                                                                                                                                                                                                                                                                                                                                                                                                                                                                                                                                                                                                                                                                                                                                                                                                                                                                                                                                                                                                                                                                                                                                                                                                                                                                                                                                                                                                                                                                                                                                                                                                                                                                                                                                                                                                                                                                                                                                                                                                                                                                        |                                                                                  |   |   |   |   |   |   |   |   |      |   |   |                          |   |   |                    |   |   |                     |   |   |                          |   |   |                       |   |   |                           |       |                     |                          |                                                           |     |                                         |           |                                 |                    |                                                                           |                     |                                                                                  |                                  |                                                   |                       |                                                                      |               |                                                  |                          |                                                                         |          |                              |              |                                                             |           |                                                                     |                |                                                                   |                        |                                                |  |  |  |
| <b>1B: PHOTOSYSTEM SUBUNITS</b>                                                                                                                                                                                                                                                                                                                                                                                                                                                                                                                                                                                                                                                                                                                                                                                                                                                                                                                                                                                                                                                                                                                                                                                                                                                                                                                                                                                                                                                                                                                                                                                                                                                                                                                                                                                                                                                                                                                                                                                                                                                                                                                                                                                                                                                                                                                                                                                              |                                                                                  |   |   |   |   |   |   |   |   |      |   |   |                          |   |   |                    |   |   |                     |   |   |                          |   |   |                       |   |   |                           |       |                     |                          |                                                           |     |                                         |           |                                 |                    |                                                                           |                     |                                                                                  |                                  |                                                   |                       |                                                                      |               |                                                  |                          |                                                                         |          |                              |              |                                                             |           |                                                                     |                |                                                                   |                        |                                                |  |  |  |
| PsbO                                                                                                                                                                                                                                                                                                                                                                                                                                                                                                                                                                                                                                                                                                                                                                                                                                                                                                                                                                                                                                                                                                                                                                                                                                                                                                                                                                                                                                                                                                                                                                                                                                                                                                                                                                                                                                                                                                                                                                                                                                                                                                                                                                                                                                                                                                                                                                                                                         |                                                                                  |   |   |   |   |   |   |   |   |      |   |   |                          |   |   |                    |   |   |                     |   |   |                          |   |   |                       |   |   |                           |       |                     |                          |                                                           |     |                                         |           |                                 |                    |                                                                           |                     |                                                                                  |                                  |                                                   |                       |                                                                      |               |                                                  |                          |                                                                         |          |                              |              |                                                             |           |                                                                     |                |                                                                   |                        |                                                |  |  |  |
| Psb27                                                                                                                                                                                                                                                                                                                                                                                                                                                                                                                                                                                                                                                                                                                                                                                                                                                                                                                                                                                                                                                                                                                                                                                                                                                                                                                                                                                                                                                                                                                                                                                                                                                                                                                                                                                                                                                                                                                                                                                                                                                                                                                                                                                                                                                                                                                                                                                                                        |                                                                                  |   |   |   |   |   |   |   |   |      |   |   |                          |   |   |                    |   |   |                     |   |   |                          |   |   |                       |   |   |                           |       |                     |                          |                                                           |     |                                         |           |                                 |                    |                                                                           |                     |                                                                                  |                                  |                                                   |                       |                                                                      |               |                                                  |                          |                                                                         |          |                              |              |                                                             |           |                                                                     |                |                                                                   |                        |                                                |  |  |  |
| Psb29                                                                                                                                                                                                                                                                                                                                                                                                                                                                                                                                                                                                                                                                                                                                                                                                                                                                                                                                                                                                                                                                                                                                                                                                                                                                                                                                                                                                                                                                                                                                                                                                                                                                                                                                                                                                                                                                                                                                                                                                                                                                                                                                                                                                                                                                                                                                                                                                                        |                                                                                  |   |   |   |   |   |   |   |   |      |   |   |                          |   |   |                    |   |   |                     |   |   |                          |   |   |                       |   |   |                           |       |                     |                          |                                                           |     |                                         |           |                                 |                    |                                                                           |                     |                                                                                  |                                  |                                                   |                       |                                                                      |               |                                                  |                          |                                                                         |          |                              |              |                                                             |           |                                                                     |                |                                                                   |                        |                                                |  |  |  |
| Psb31                                                                                                                                                                                                                                                                                                                                                                                                                                                                                                                                                                                                                                                                                                                                                                                                                                                                                                                                                                                                                                                                                                                                                                                                                                                                                                                                                                                                                                                                                                                                                                                                                                                                                                                                                                                                                                                                                                                                                                                                                                                                                                                                                                                                                                                                                                                                                                                                                        |                                                                                  |   |   |   |   |   |   |   |   |      |   |   |                          |   |   |                    |   |   |                     |   |   |                          |   |   |                       |   |   |                           |       |                     |                          |                                                           |     |                                         |           |                                 |                    |                                                                           |                     |                                                                                  |                                  |                                                   |                       |                                                                      |               |                                                  |                          |                                                                         |          |                              |              |                                                             |           |                                                                     |                |                                                                   |                        |                                                |  |  |  |
| PsbM                                                                                                                                                                                                                                                                                                                                                                                                                                                                                                                                                                                                                                                                                                                                                                                                                                                                                                                                                                                                                                                                                                                                                                                                                                                                                                                                                                                                                                                                                                                                                                                                                                                                                                                                                                                                                                                                                                                                                                                                                                                                                                                                                                                                                                                                                                                                                                                                                         |                                                                                  |   |   |   |   |   |   |   |   |      |   |   |                          |   |   |                    |   |   |                     |   |   |                          |   |   |                       |   |   |                           |       |                     |                          |                                                           |     |                                         |           |                                 |                    |                                                                           |                     |                                                                                  |                                  |                                                   |                       |                                                                      |               |                                                  |                          |                                                                         |          |                              |              |                                                             |           |                                                                     |                |                                                                   |                        |                                                |  |  |  |
| PsbP                                                                                                                                                                                                                                                                                                                                                                                                                                                                                                                                                                                                                                                                                                                                                                                                                                                                                                                                                                                                                                                                                                                                                                                                                                                                                                                                                                                                                                                                                                                                                                                                                                                                                                                                                                                                                                                                                                                                                                                                                                                                                                                                                                                                                                                                                                                                                                                                                         |                                                                                  |   |   |   |   |   |   |   |   |      |   |   |                          |   |   |                    |   |   |                     |   |   |                          |   |   |                       |   |   |                           |       |                     |                          |                                                           |     |                                         |           |                                 |                    |                                                                           |                     |                                                                                  |                                  |                                                   |                       |                                                                      |               |                                                  |                          |                                                                         |          |                              |              |                                                             |           |                                                                     |                |                                                                   |                        |                                                |  |  |  |
| PsbQ                                                                                                                                                                                                                                                                                                                                                                                                                                                                                                                                                                                                                                                                                                                                                                                                                                                                                                                                                                                                                                                                                                                                                                                                                                                                                                                                                                                                                                                                                                                                                                                                                                                                                                                                                                                                                                                                                                                                                                                                                                                                                                                                                                                                                                                                                                                                                                                                                         |                                                                                  |   |   |   |   |   |   |   |   |      |   |   |                          |   |   |                    |   |   |                     |   |   |                          |   |   |                       |   |   |                           |       |                     |                          |                                                           |     |                                         |           |                                 |                    |                                                                           |                     |                                                                                  |                                  |                                                   |                       |                                                                      |               |                                                  |                          |                                                                         |          |                              |              |                                                             |           |                                                                     |                |                                                                   |                        |                                                |  |  |  |
| PsbU                                                                                                                                                                                                                                                                                                                                                                                                                                                                                                                                                                                                                                                                                                                                                                                                                                                                                                                                                                                                                                                                                                                                                                                                                                                                                                                                                                                                                                                                                                                                                                                                                                                                                                                                                                                                                                                                                                                                                                                                                                                                                                                                                                                                                                                                                                                                                                                                                         |                                                                                  |   |   |   |   |   |   |   |   |      |   |   |                          |   |   |                    |   |   |                     |   |   |                          |   |   |                       |   |   |                           |       |                     |                          |                                                           |     |                                         |           |                                 |                    |                                                                           |                     |                                                                                  |                                  |                                                   |                       |                                                                      |               |                                                  |                          |                                                                         |          |                              |              |                                                             |           |                                                                     |                |                                                                   |                        |                                                |  |  |  |
| PsbW                                                                                                                                                                                                                                                                                                                                                                                                                                                                                                                                                                                                                                                                                                                                                                                                                                                                                                                                                                                                                                                                                                                                                                                                                                                                                                                                                                                                                                                                                                                                                                                                                                                                                                                                                                                                                                                                                                                                                                                                                                                                                                                                                                                                                                                                                                                                                                                                                         |                                                                                  |   |   |   |   |   |   |   |   |      |   |   |                          |   |   |                    |   |   |                     |   |   |                          |   |   |                       |   |   |                           |       |                     |                          |                                                           |     |                                         |           |                                 |                    |                                                                           |                     |                                                                                  |                                  |                                                   |                       |                                                                      |               |                                                  |                          |                                                                         |          |                              |              |                                                             |           |                                                                     |                |                                                                   |                        |                                                |  |  |  |
| CPLD51                                                                                                                                                                                                                                                                                                                                                                                                                                                                                                                                                                                                                                                                                                                                                                                                                                                                                                                                                                                                                                                                                                                                                                                                                                                                                                                                                                                                                                                                                                                                                                                                                                                                                                                                                                                                                                                                                                                                                                                                                                                                                                                                                                                                                                                                                                                                                                                                                       |                                                                                  |   |   |   |   |   |   |   |   |      |   |   |                          |   |   |                    |   |   |                     |   |   |                          |   |   |                       |   |   |                           |       |                     |                          |                                                           |     |                                         |           |                                 |                    |                                                                           |                     |                                                                                  |                                  |                                                   |                       |                                                                      |               |                                                  |                          |                                                                         |          |                              |              |                                                             |           |                                                                     |                |                                                                   |                        |                                                |  |  |  |
| petA                                                                                                                                                                                                                                                                                                                                                                                                                                                                                                                                                                                                                                                                                                                                                                                                                                                                                                                                                                                                                                                                                                                                                                                                                                                                                                                                                                                                                                                                                                                                                                                                                                                                                                                                                                                                                                                                                                                                                                                                                                                                                                                                                                                                                                                                                                                                                                                                                         |                                                                                  |   |   |   |   |   |   |   |   |      |   |   |                          |   |   |                    |   |   |                     |   |   |                          |   |   |                       |   |   |                           |       |                     |                          |                                                           |     |                                         |           |                                 |                    |                                                                           |                     |                                                                                  |                                  |                                                   |                       |                                                                      |               |                                                  |                          |                                                                         |          |                              |              |                                                             |           |                                                                     |                |                                                                   |                        |                                                |  |  |  |
| petC                                                                                                                                                                                                                                                                                                                                                                                                                                                                                                                                                                                                                                                                                                                                                                                                                                                                                                                                                                                                                                                                                                                                                                                                                                                                                                                                                                                                                                                                                                                                                                                                                                                                                                                                                                                                                                                                                                                                                                                                                                                                                                                                                                                                                                                                                                                                                                                                                         |                                                                                  |   |   |   |   |   |   |   |   |      |   |   |                          |   |   |                    |   |   |                     |   |   |                          |   |   |                       |   |   |                           |       |                     |                          |                                                           |     |                                         |           |                                 |                    |                                                                           |                     |                                                                                  |                                  |                                                   |                       |                                                                      |               |                                                  |                          |                                                                         |          |                              |              |                                                             |           |                                                                     |                |                                                                   |                        |                                                |  |  |  |
| Cytochrome c6                                                                                                                                                                                                                                                                                                                                                                                                                                                                                                                                                                                                                                                                                                                                                                                                                                                                                                                                                                                                                                                                                                                                                                                                                                                                                                                                                                                                                                                                                                                                                                                                                                                                                                                                                                                                                                                                                                                                                                                                                                                                                                                                                                                                                                                                                                                                                                                                                |                                                                                  |   |   |   |   |   |   |   |   |      |   |   |                          |   |   |                    |   |   |                     |   |   |                          |   |   |                       |   |   |                           |       |                     |                          |                                                           |     |                                         |           |                                 |                    |                                                                           |                     |                                                                                  |                                  |                                                   |                       |                                                                      |               |                                                  |                          |                                                                         |          |                              |              |                                                             |           |                                                                     |                |                                                                   |                        |                                                |  |  |  |
| PsaO                                                                                                                                                                                                                                                                                                                                                                                                                                                                                                                                                                                                                                                                                                                                                                                                                                                                                                                                                                                                                                                                                                                                                                                                                                                                                                                                                                                                                                                                                                                                                                                                                                                                                                                                                                                                                                                                                                                                                                                                                                                                                                                                                                                                                                                                                                                                                                                                                         |                                                                                  |   |   |   |   |   |   |   |   |      |   |   |                          |   |   |                    |   |   |                     |   |   |                          |   |   |                       |   |   |                           |       |                     |                          |                                                           |     |                                         |           |                                 |                    |                                                                           |                     |                                                                                  |                                  |                                                   |                       |                                                                      |               |                                                  |                          |                                                                         |          |                              |              |                                                             |           |                                                                     |                |                                                                   |                        |                                                |  |  |  |
| Ferredoxin                                                                                                                                                                                                                                                                                                                                                                                                                                                                                                                                                                                                                                                                                                                                                                                                                                                                                                                                                                                                                                                                                                                                                                                                                                                                                                                                                                                                                                                                                                                                                                                                                                                                                                                                                                                                                                                                                                                                                                                                                                                                                                                                                                                                                                                                                                                                                                                                                   |                                                                                  |   |   |   |   |   |   |   |   |      |   |   |                          |   |   |                    |   |   |                     |   |   |                          |   |   |                       |   |   |                           |       |                     |                          |                                                           |     |                                         |           |                                 |                    |                                                                           |                     |                                                                                  |                                  |                                                   |                       |                                                                      |               |                                                  |                          |                                                                         |          |                              |              |                                                             |           |                                                                     |                |                                                                   |                        |                                                |  |  |  |
| Flavodoxin                                                                                                                                                                                                                                                                                                                                                                                                                                                                                                                                                                                                                                                                                                                                                                                                                                                                                                                                                                                                                                                                                                                                                                                                                                                                                                                                                                                                                                                                                                                                                                                                                                                                                                                                                                                                                                                                                                                                                                                                                                                                                                                                                                                                                                                                                                                                                                                                                   |                                                                                  |   |   |   |   |   |   |   |   |      |   |   |                          |   |   |                    |   |   |                     |   |   |                          |   |   |                       |   |   |                           |       |                     |                          |                                                           |     |                                         |           |                                 |                    |                                                                           |                     |                                                                                  |                                  |                                                   |                       |                                                                      |               |                                                  |                          |                                                                         |          |                              |              |                                                             |           |                                                                     |                |                                                                   |                        |                                                |  |  |  |
| atpC                                                                                                                                                                                                                                                                                                                                                                                                                                                                                                                                                                                                                                                                                                                                                                                                                                                                                                                                                                                                                                                                                                                                                                                                                                                                                                                                                                                                                                                                                                                                                                                                                                                                                                                                                                                                                                                                                                                                                                                                                                                                                                                                                                                                                                                                                                                                                                                                                         |                                                                                  |   |   |   |   |   |   |   |   |      |   |   |                          |   |   |                    |   |   |                     |   |   |                          |   |   |                       |   |   |                           |       |                     |                          |                                                           |     |                                         |           |                                 |                    |                                                                           |                     |                                                                                  |                                  |                                                   |                       |                                                                      |               |                                                  |                          |                                                                         |          |                              |              |                                                             |           |                                                                     |                |                                                                   |                        |                                                |  |  |  |
| Hcf101                                                                                                                                                                                                                                                                                                                                                                                                                                                                                                                                                                                                                                                                                                                                                                                                                                                                                                                                                                                                                                                                                                                                                                                                                                                                                                                                                                                                                                                                                                                                                                                                                                                                                                                                                                                                                                                                                                                                                                                                                                                                                                                                                                                                                                                                                                                                                                                                                       |                                                                                  |   |   |   |   |   |   |   |   |      |   |   |                          |   |   |                    |   |   |                     |   |   |                          |   |   |                       |   |   |                           |       |                     |                          |                                                           |     |                                         |           |                                 |                    |                                                                           |                     |                                                                                  |                                  |                                                   |                       |                                                                      |               |                                                  |                          |                                                                         |          |                              |              |                                                             |           |                                                                     |                |                                                                   |                        |                                                |  |  |  |
| Hcf136                                                                                                                                                                                                                                                                                                                                                                                                                                                                                                                                                                                                                                                                                                                                                                                                                                                                                                                                                                                                                                                                                                                                                                                                                                                                                                                                                                                                                                                                                                                                                                                                                                                                                                                                                                                                                                                                                                                                                                                                                                                                                                                                                                                                                                                                                                                                                                                                                       |                                                                                  |   |   |   |   |   |   |   |   |      |   |   |                          |   |   |                    |   |   |                     |   |   |                          |   |   |                       |   |   |                           |       |                     |                          |                                                           |     |                                         |           |                                 |                    |                                                                           |                     |                                                                                  |                                  |                                                   |                       |                                                                      |               |                                                  |                          |                                                                         |          |                              |              |                                                             |           |                                                                     |                |                                                                   |                        |                                                |  |  |  |
| ycf4                                                                                                                                                                                                                                                                                                                                                                                                                                                                                                                                                                                                                                                                                                                                                                                                                                                                                                                                                                                                                                                                                                                                                                                                                                                                                                                                                                                                                                                                                                                                                                                                                                                                                                                                                                                                                                                                                                                                                                                                                                                                                                                                                                                                                                                                                                                                                                                                                         |                                                                                  |   |   |   |   |   |   |   |   |      |   |   |                          |   |   |                    |   |   |                     |   |   |                          |   |   |                       |   |   |                           |       |                     |                          |                                                           |     |                                         |           |                                 |                    |                                                                           |                     |                                                                                  |                                  |                                                   |                       |                                                                      |               |                                                  |                          |                                                                         |          |                              |              |                                                             |           |                                                                     |                |                                                                   |                        |                                                |  |  |  |
| PGR5                                                                                                                                                                                                                                                                                                                                                                                                                                                                                                                                                                                                                                                                                                                                                                                                                                                                                                                                                                                                                                                                                                                                                                                                                                                                                                                                                                                                                                                                                                                                                                                                                                                                                                                                                                                                                                                                                                                                                                                                                                                                                                                                                                                                                                                                                                                                                                                                                         |                                                                                  |   |   |   |   |   |   |   |   |      |   |   |                          |   |   |                    |   |   |                     |   |   |                          |   |   |                       |   |   |                           |       |                     |                          |                                                           |     |                                         |           |                                 |                    |                                                                           |                     |                                                                                  |                                  |                                                   |                       |                                                                      |               |                                                  |                          |                                                                         |          |                              |              |                                                             |           |                                                                     |                |                                                                   |                        |                                                |  |  |  |
| PTOX                                                                                                                                                                                                                                                                                                                                                                                                                                                                                                                                                                                                                                                                                                                                                                                                                                                                                                                                                                                                                                                                                                                                                                                                                                                                                                                                                                                                                                                                                                                                                                                                                                                                                                                                                                                                                                                                                                                                                                                                                                                                                                                                                                                                                                                                                                                                                                                                                         |                                                                                  |   |   |   |   |   |   |   |   |      |   |   |                          |   |   |                    |   |   |                     |   |   |                          |   |   |                       |   |   |                           |       |                     |                          |                                                           |     |                                         |           |                                 |                    |                                                                           |                     |                                                                                  |                                  |                                                   |                       |                                                                      |               |                                                  |                          |                                                                         |          |                              |              |                                                             |           |                                                                     |                |                                                                   |                        |                                                |  |  |  |
| <p>This figure shows the distribution and probable localisation central plastid processes in different chrysophyte groups.</p> <p>Protein present and plastid-targeted <span style="color: purple;">■</span> <b>Photosynthetic species</b> Identified by floating BLAST <span style="border: 1px solid black; padding: 2px;">F</span></p> <p>Protein present and mitochondria-targeted <span style="color: orange;">■</span> <b>Non-photosynthetic species</b> Identified by reciprocal BLAST <span style="border: 1px solid black; padding: 2px;">R</span></p> <p>Protein detected but no targeting sequence/ uncertain. <span style="color: gray;">■</span> Protein confirmed by phylogeny <span style="border: 1px solid black; padding: 2px;">P</span></p> <table border="1" style="width: 100%; border-collapse: collapse;"> <thead> <tr> <th>Group</th> <th>Constituent species</th> </tr> </thead> <tbody> <tr> <td>Paraphysomonas</td> <td>Paraphysomonas bandaiensis, vestita, imperforata (MMETSP)</td> </tr> <tr> <td>SAG</td> <td>SAGH1, SAGH2 (Seeleuthner et al., 2018)</td> </tr> <tr> <td>NIES_1846</td> <td>Spumella NIES 1846 (this study)</td> </tr> <tr> <td>Pedospumella group</td> <td>Spumella elongata (MMETSP); Pedospumella encystans, sinomuralis (Beisser)</td> </tr> <tr> <td>core Spumella clade</td> <td>Spumella vulgaris, bureschii, lacusvadoi; Spumella ex. Apoikiospumella (Beisser)</td> </tr> <tr> <td>Acrispumella mszimbaensis JBAF33</td> <td>Acrispumella mszimbaensis JBAF33 (Beisser et al.)</td> </tr> <tr> <td>Poteriospumella group</td> <td>Poteriospumella lacustris sp. JBM10, JBC07, ,JBNZ41 (Beisser et al.)</td> </tr> <tr> <td>Cornospumella</td> <td>Cornospumella fuschlensis AR4D6 (Beisser et al.)</td> </tr> <tr> <td>Photosynthetic outgroups</td> <td>Phaeomonas, Pinguicoccus, Synchroma (MMETSP); Nannochloropsis (genomic)</td> </tr> <tr> <td>CCMP1899</td> <td>Ochromonas CCMP1899 (MMETSP)</td> </tr> <tr> <td>Synurophytes</td> <td>Mallomonas CCMP3275 (MMETSP), Synura sp. L02345KE (Beisser)</td> </tr> <tr> <td>Dinobryon</td> <td>Dinobryon UTEXLB2267 (MMETSP); Dinobryon FU22KAK, LO226KS (Beisser)</td> </tr> <tr> <td>Uroglena clade</td> <td>Ochromonas CCMP1393, CCMP2298 (MMETSP); Uroglena WA34KE (Beisser)</td> </tr> <tr> <td>Poteriochromonas clade</td> <td>Ochromonas BG-1, Poteriochromonas D5 (Beisser)</td> </tr> </tbody> </table> |                                                                                  |   |   |   |   |   |   |   |   |      |   |   |                          |   |   |                    |   |   |                     |   |   |                          |   |   |                       |   |   |                           | Group | Constituent species | Paraphysomonas           | Paraphysomonas bandaiensis, vestita, imperforata (MMETSP) | SAG | SAGH1, SAGH2 (Seeleuthner et al., 2018) | NIES_1846 | Spumella NIES 1846 (this study) | Pedospumella group | Spumella elongata (MMETSP); Pedospumella encystans, sinomuralis (Beisser) | core Spumella clade | Spumella vulgaris, bureschii, lacusvadoi; Spumella ex. Apoikiospumella (Beisser) | Acrispumella mszimbaensis JBAF33 | Acrispumella mszimbaensis JBAF33 (Beisser et al.) | Poteriospumella group | Poteriospumella lacustris sp. JBM10, JBC07, ,JBNZ41 (Beisser et al.) | Cornospumella | Cornospumella fuschlensis AR4D6 (Beisser et al.) | Photosynthetic outgroups | Phaeomonas, Pinguicoccus, Synchroma (MMETSP); Nannochloropsis (genomic) | CCMP1899 | Ochromonas CCMP1899 (MMETSP) | Synurophytes | Mallomonas CCMP3275 (MMETSP), Synura sp. L02345KE (Beisser) | Dinobryon | Dinobryon UTEXLB2267 (MMETSP); Dinobryon FU22KAK, LO226KS (Beisser) | Uroglena clade | Ochromonas CCMP1393, CCMP2298 (MMETSP); Uroglena WA34KE (Beisser) | Poteriochromonas clade | Ochromonas BG-1, Poteriochromonas D5 (Beisser) |  |  |  |
| Group                                                                                                                                                                                                                                                                                                                                                                                                                                                                                                                                                                                                                                                                                                                                                                                                                                                                                                                                                                                                                                                                                                                                                                                                                                                                                                                                                                                                                                                                                                                                                                                                                                                                                                                                                                                                                                                                                                                                                                                                                                                                                                                                                                                                                                                                                                                                                                                                                        | Constituent species                                                              |   |   |   |   |   |   |   |   |      |   |   |                          |   |   |                    |   |   |                     |   |   |                          |   |   |                       |   |   |                           |       |                     |                          |                                                           |     |                                         |           |                                 |                    |                                                                           |                     |                                                                                  |                                  |                                                   |                       |                                                                      |               |                                                  |                          |                                                                         |          |                              |              |                                                             |           |                                                                     |                |                                                                   |                        |                                                |  |  |  |
| Paraphysomonas                                                                                                                                                                                                                                                                                                                                                                                                                                                                                                                                                                                                                                                                                                                                                                                                                                                                                                                                                                                                                                                                                                                                                                                                                                                                                                                                                                                                                                                                                                                                                                                                                                                                                                                                                                                                                                                                                                                                                                                                                                                                                                                                                                                                                                                                                                                                                                                                               | Paraphysomonas bandaiensis, vestita, imperforata (MMETSP)                        |   |   |   |   |   |   |   |   |      |   |   |                          |   |   |                    |   |   |                     |   |   |                          |   |   |                       |   |   |                           |       |                     |                          |                                                           |     |                                         |           |                                 |                    |                                                                           |                     |                                                                                  |                                  |                                                   |                       |                                                                      |               |                                                  |                          |                                                                         |          |                              |              |                                                             |           |                                                                     |                |                                                                   |                        |                                                |  |  |  |
| SAG                                                                                                                                                                                                                                                                                                                                                                                                                                                                                                                                                                                                                                                                                                                                                                                                                                                                                                                                                                                                                                                                                                                                                                                                                                                                                                                                                                                                                                                                                                                                                                                                                                                                                                                                                                                                                                                                                                                                                                                                                                                                                                                                                                                                                                                                                                                                                                                                                          | SAGH1, SAGH2 (Seeleuthner et al., 2018)                                          |   |   |   |   |   |   |   |   |      |   |   |                          |   |   |                    |   |   |                     |   |   |                          |   |   |                       |   |   |                           |       |                     |                          |                                                           |     |                                         |           |                                 |                    |                                                                           |                     |                                                                                  |                                  |                                                   |                       |                                                                      |               |                                                  |                          |                                                                         |          |                              |              |                                                             |           |                                                                     |                |                                                                   |                        |                                                |  |  |  |
| NIES_1846                                                                                                                                                                                                                                                                                                                                                                                                                                                                                                                                                                                                                                                                                                                                                                                                                                                                                                                                                                                                                                                                                                                                                                                                                                                                                                                                                                                                                                                                                                                                                                                                                                                                                                                                                                                                                                                                                                                                                                                                                                                                                                                                                                                                                                                                                                                                                                                                                    | Spumella NIES 1846 (this study)                                                  |   |   |   |   |   |   |   |   |      |   |   |                          |   |   |                    |   |   |                     |   |   |                          |   |   |                       |   |   |                           |       |                     |                          |                                                           |     |                                         |           |                                 |                    |                                                                           |                     |                                                                                  |                                  |                                                   |                       |                                                                      |               |                                                  |                          |                                                                         |          |                              |              |                                                             |           |                                                                     |                |                                                                   |                        |                                                |  |  |  |
| Pedospumella group                                                                                                                                                                                                                                                                                                                                                                                                                                                                                                                                                                                                                                                                                                                                                                                                                                                                                                                                                                                                                                                                                                                                                                                                                                                                                                                                                                                                                                                                                                                                                                                                                                                                                                                                                                                                                                                                                                                                                                                                                                                                                                                                                                                                                                                                                                                                                                                                           | Spumella elongata (MMETSP); Pedospumella encystans, sinomuralis (Beisser)        |   |   |   |   |   |   |   |   |      |   |   |                          |   |   |                    |   |   |                     |   |   |                          |   |   |                       |   |   |                           |       |                     |                          |                                                           |     |                                         |           |                                 |                    |                                                                           |                     |                                                                                  |                                  |                                                   |                       |                                                                      |               |                                                  |                          |                                                                         |          |                              |              |                                                             |           |                                                                     |                |                                                                   |                        |                                                |  |  |  |
| core Spumella clade                                                                                                                                                                                                                                                                                                                                                                                                                                                                                                                                                                                                                                                                                                                                                                                                                                                                                                                                                                                                                                                                                                                                                                                                                                                                                                                                                                                                                                                                                                                                                                                                                                                                                                                                                                                                                                                                                                                                                                                                                                                                                                                                                                                                                                                                                                                                                                                                          | Spumella vulgaris, bureschii, lacusvadoi; Spumella ex. Apoikiospumella (Beisser) |   |   |   |   |   |   |   |   |      |   |   |                          |   |   |                    |   |   |                     |   |   |                          |   |   |                       |   |   |                           |       |                     |                          |                                                           |     |                                         |           |                                 |                    |                                                                           |                     |                                                                                  |                                  |                                                   |                       |                                                                      |               |                                                  |                          |                                                                         |          |                              |              |                                                             |           |                                                                     |                |                                                                   |                        |                                                |  |  |  |
| Acrispumella mszimbaensis JBAF33                                                                                                                                                                                                                                                                                                                                                                                                                                                                                                                                                                                                                                                                                                                                                                                                                                                                                                                                                                                                                                                                                                                                                                                                                                                                                                                                                                                                                                                                                                                                                                                                                                                                                                                                                                                                                                                                                                                                                                                                                                                                                                                                                                                                                                                                                                                                                                                             | Acrispumella mszimbaensis JBAF33 (Beisser et al.)                                |   |   |   |   |   |   |   |   |      |   |   |                          |   |   |                    |   |   |                     |   |   |                          |   |   |                       |   |   |                           |       |                     |                          |                                                           |     |                                         |           |                                 |                    |                                                                           |                     |                                                                                  |                                  |                                                   |                       |                                                                      |               |                                                  |                          |                                                                         |          |                              |              |                                                             |           |                                                                     |                |                                                                   |                        |                                                |  |  |  |
| Poteriospumella group                                                                                                                                                                                                                                                                                                                                                                                                                                                                                                                                                                                                                                                                                                                                                                                                                                                                                                                                                                                                                                                                                                                                                                                                                                                                                                                                                                                                                                                                                                                                                                                                                                                                                                                                                                                                                                                                                                                                                                                                                                                                                                                                                                                                                                                                                                                                                                                                        | Poteriospumella lacustris sp. JBM10, JBC07, ,JBNZ41 (Beisser et al.)             |   |   |   |   |   |   |   |   |      |   |   |                          |   |   |                    |   |   |                     |   |   |                          |   |   |                       |   |   |                           |       |                     |                          |                                                           |     |                                         |           |                                 |                    |                                                                           |                     |                                                                                  |                                  |                                                   |                       |                                                                      |               |                                                  |                          |                                                                         |          |                              |              |                                                             |           |                                                                     |                |                                                                   |                        |                                                |  |  |  |
| Cornospumella                                                                                                                                                                                                                                                                                                                                                                                                                                                                                                                                                                                                                                                                                                                                                                                                                                                                                                                                                                                                                                                                                                                                                                                                                                                                                                                                                                                                                                                                                                                                                                                                                                                                                                                                                                                                                                                                                                                                                                                                                                                                                                                                                                                                                                                                                                                                                                                                                | Cornospumella fuschlensis AR4D6 (Beisser et al.)                                 |   |   |   |   |   |   |   |   |      |   |   |                          |   |   |                    |   |   |                     |   |   |                          |   |   |                       |   |   |                           |       |                     |                          |                                                           |     |                                         |           |                                 |                    |                                                                           |                     |                                                                                  |                                  |                                                   |                       |                                                                      |               |                                                  |                          |                                                                         |          |                              |              |                                                             |           |                                                                     |                |                                                                   |                        |                                                |  |  |  |
| Photosynthetic outgroups                                                                                                                                                                                                                                                                                                                                                                                                                                                                                                                                                                                                                                                                                                                                                                                                                                                                                                                                                                                                                                                                                                                                                                                                                                                                                                                                                                                                                                                                                                                                                                                                                                                                                                                                                                                                                                                                                                                                                                                                                                                                                                                                                                                                                                                                                                                                                                                                     | Phaeomonas, Pinguicoccus, Synchroma (MMETSP); Nannochloropsis (genomic)          |   |   |   |   |   |   |   |   |      |   |   |                          |   |   |                    |   |   |                     |   |   |                          |   |   |                       |   |   |                           |       |                     |                          |                                                           |     |                                         |           |                                 |                    |                                                                           |                     |                                                                                  |                                  |                                                   |                       |                                                                      |               |                                                  |                          |                                                                         |          |                              |              |                                                             |           |                                                                     |                |                                                                   |                        |                                                |  |  |  |
| CCMP1899                                                                                                                                                                                                                                                                                                                                                                                                                                                                                                                                                                                                                                                                                                                                                                                                                                                                                                                                                                                                                                                                                                                                                                                                                                                                                                                                                                                                                                                                                                                                                                                                                                                                                                                                                                                                                                                                                                                                                                                                                                                                                                                                                                                                                                                                                                                                                                                                                     | Ochromonas CCMP1899 (MMETSP)                                                     |   |   |   |   |   |   |   |   |      |   |   |                          |   |   |                    |   |   |                     |   |   |                          |   |   |                       |   |   |                           |       |                     |                          |                                                           |     |                                         |           |                                 |                    |                                                                           |                     |                                                                                  |                                  |                                                   |                       |                                                                      |               |                                                  |                          |                                                                         |          |                              |              |                                                             |           |                                                                     |                |                                                                   |                        |                                                |  |  |  |
| Synurophytes                                                                                                                                                                                                                                                                                                                                                                                                                                                                                                                                                                                                                                                                                                                                                                                                                                                                                                                                                                                                                                                                                                                                                                                                                                                                                                                                                                                                                                                                                                                                                                                                                                                                                                                                                                                                                                                                                                                                                                                                                                                                                                                                                                                                                                                                                                                                                                                                                 | Mallomonas CCMP3275 (MMETSP), Synura sp. L02345KE (Beisser)                      |   |   |   |   |   |   |   |   |      |   |   |                          |   |   |                    |   |   |                     |   |   |                          |   |   |                       |   |   |                           |       |                     |                          |                                                           |     |                                         |           |                                 |                    |                                                                           |                     |                                                                                  |                                  |                                                   |                       |                                                                      |               |                                                  |                          |                                                                         |          |                              |              |                                                             |           |                                                                     |                |                                                                   |                        |                                                |  |  |  |
| Dinobryon                                                                                                                                                                                                                                                                                                                                                                                                                                                                                                                                                                                                                                                                                                                                                                                                                                                                                                                                                                                                                                                                                                                                                                                                                                                                                                                                                                                                                                                                                                                                                                                                                                                                                                                                                                                                                                                                                                                                                                                                                                                                                                                                                                                                                                                                                                                                                                                                                    | Dinobryon UTEXLB2267 (MMETSP); Dinobryon FU22KAK, LO226KS (Beisser)              |   |   |   |   |   |   |   |   |      |   |   |                          |   |   |                    |   |   |                     |   |   |                          |   |   |                       |   |   |                           |       |                     |                          |                                                           |     |                                         |           |                                 |                    |                                                                           |                     |                                                                                  |                                  |                                                   |                       |                                                                      |               |                                                  |                          |                                                                         |          |                              |              |                                                             |           |                                                                     |                |                                                                   |                        |                                                |  |  |  |
| Uroglena clade                                                                                                                                                                                                                                                                                                                                                                                                                                                                                                                                                                                                                                                                                                                                                                                                                                                                                                                                                                                                                                                                                                                                                                                                                                                                                                                                                                                                                                                                                                                                                                                                                                                                                                                                                                                                                                                                                                                                                                                                                                                                                                                                                                                                                                                                                                                                                                                                               | Ochromonas CCMP1393, CCMP2298 (MMETSP); Uroglena WA34KE (Beisser)                |   |   |   |   |   |   |   |   |      |   |   |                          |   |   |                    |   |   |                     |   |   |                          |   |   |                       |   |   |                           |       |                     |                          |                                                           |     |                                         |           |                                 |                    |                                                                           |                     |                                                                                  |                                  |                                                   |                       |                                                                      |               |                                                  |                          |                                                                         |          |                              |              |                                                             |           |                                                                     |                |                                                                   |                        |                                                |  |  |  |
| Poteriochromonas clade                                                                                                                                                                                                                                                                                                                                                                                                                                                                                                                                                                                                                                                                                                                                                                                                                                                                                                                                                                                                                                                                                                                                                                                                                                                                                                                                                                                                                                                                                                                                                                                                                                                                                                                                                                                                                                                                                                                                                                                                                                                                                                                                                                                                                                                                                                                                                                                                       | Ochromonas BG-1, Poteriochromonas D5 (Beisser)                                   |   |   |   |   |   |   |   |   |      |   |   |                          |   |   |                    |   |   |                     |   |   |                          |   |   |                       |   |   |                           |       |                     |                          |                                                           |     |                                         |           |                                 |                    |                                                                           |                     |                                                                                  |                                  |                                                   |                       |                                                                      |               |                                                  |                          |                                                                         |          |                              |              |                                                             |           |                                                                     |                |                                                                   |                        |                                                |  |  |  |

Fig. S8, panel B

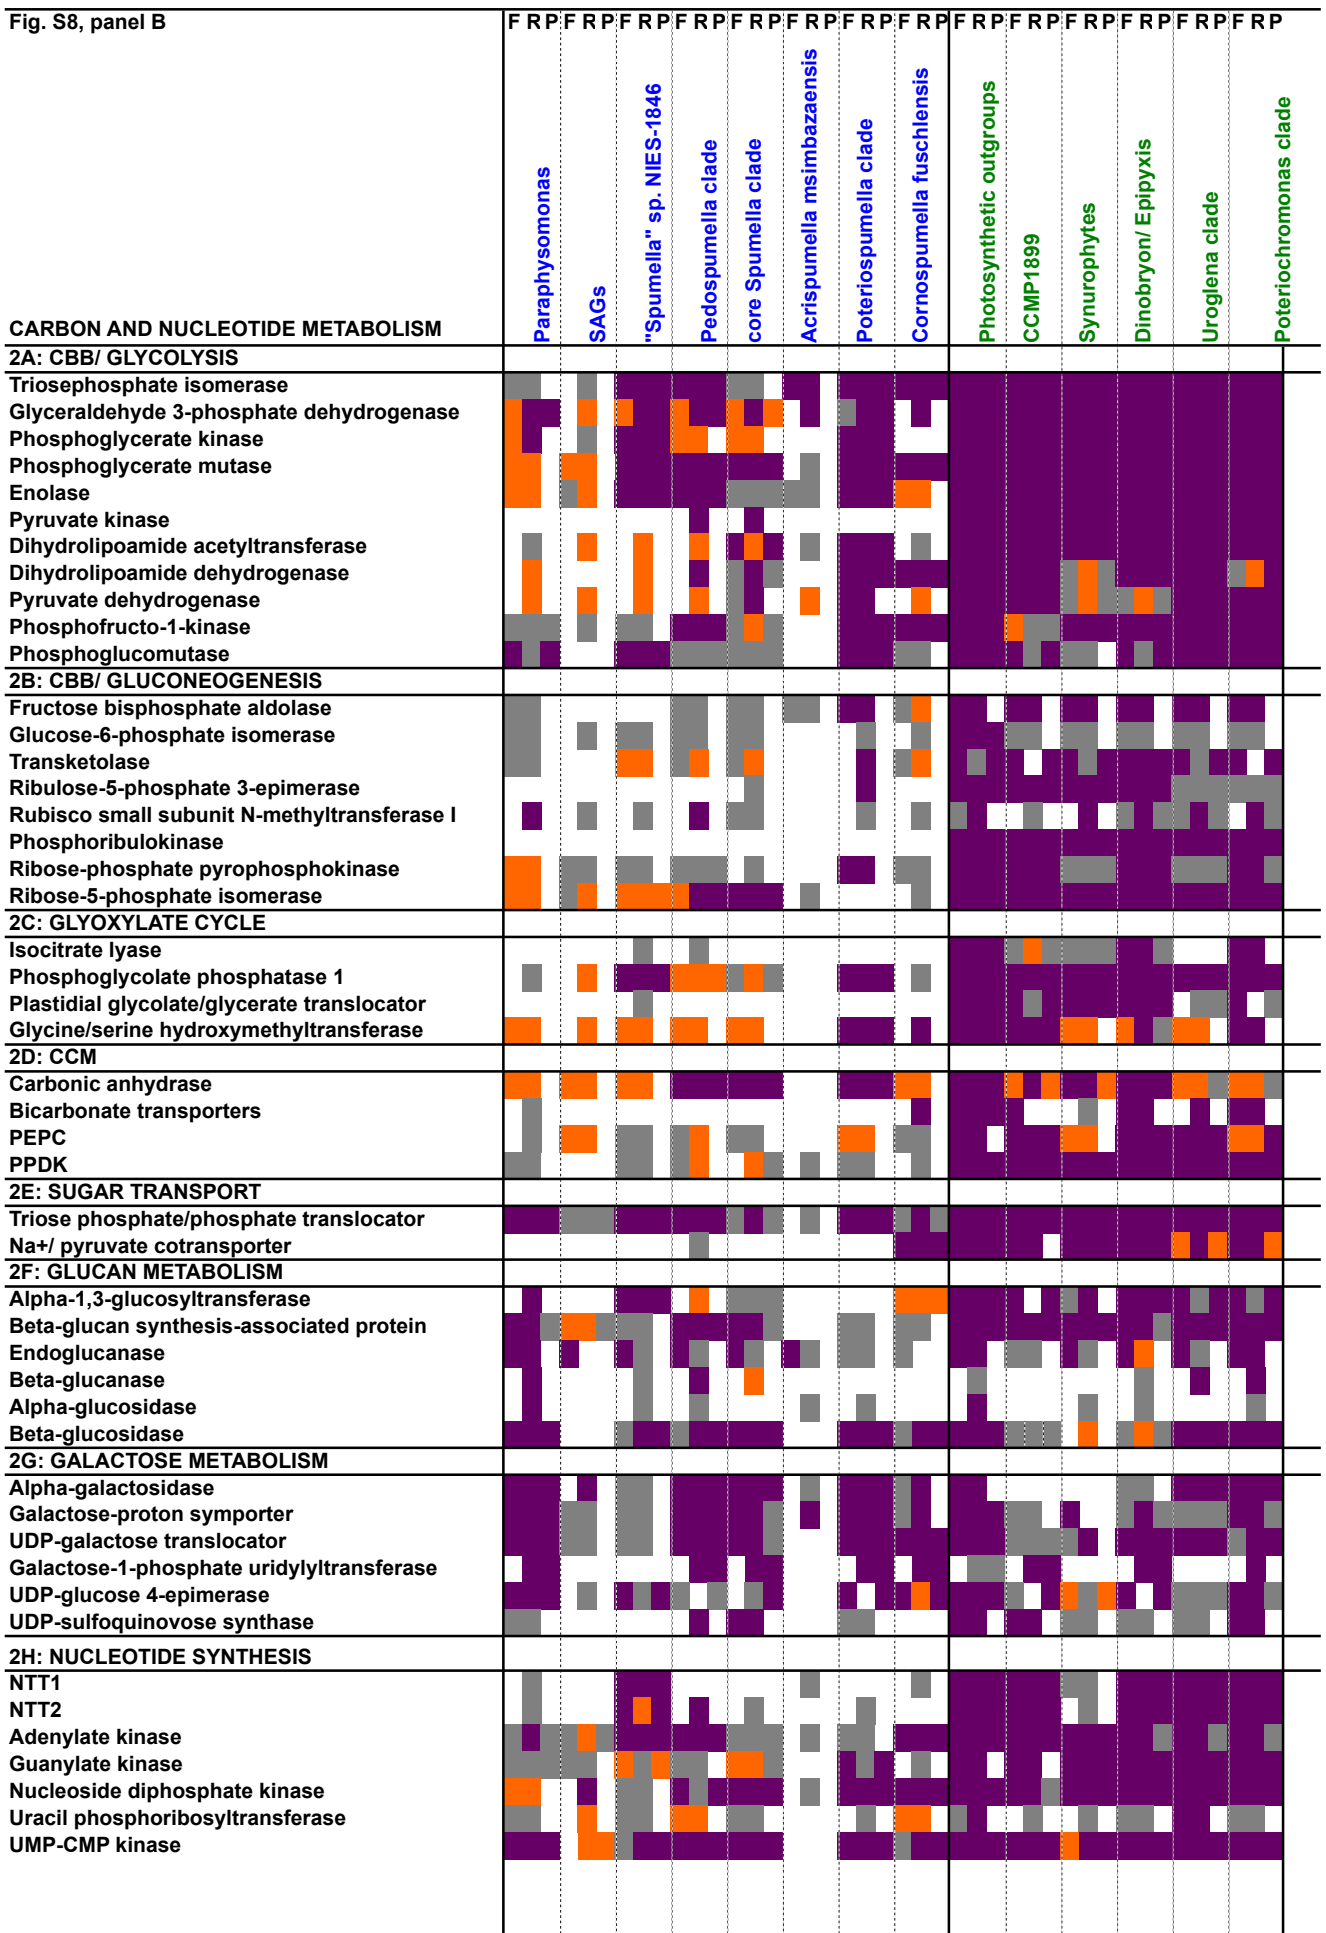





Fig. S8, panel E

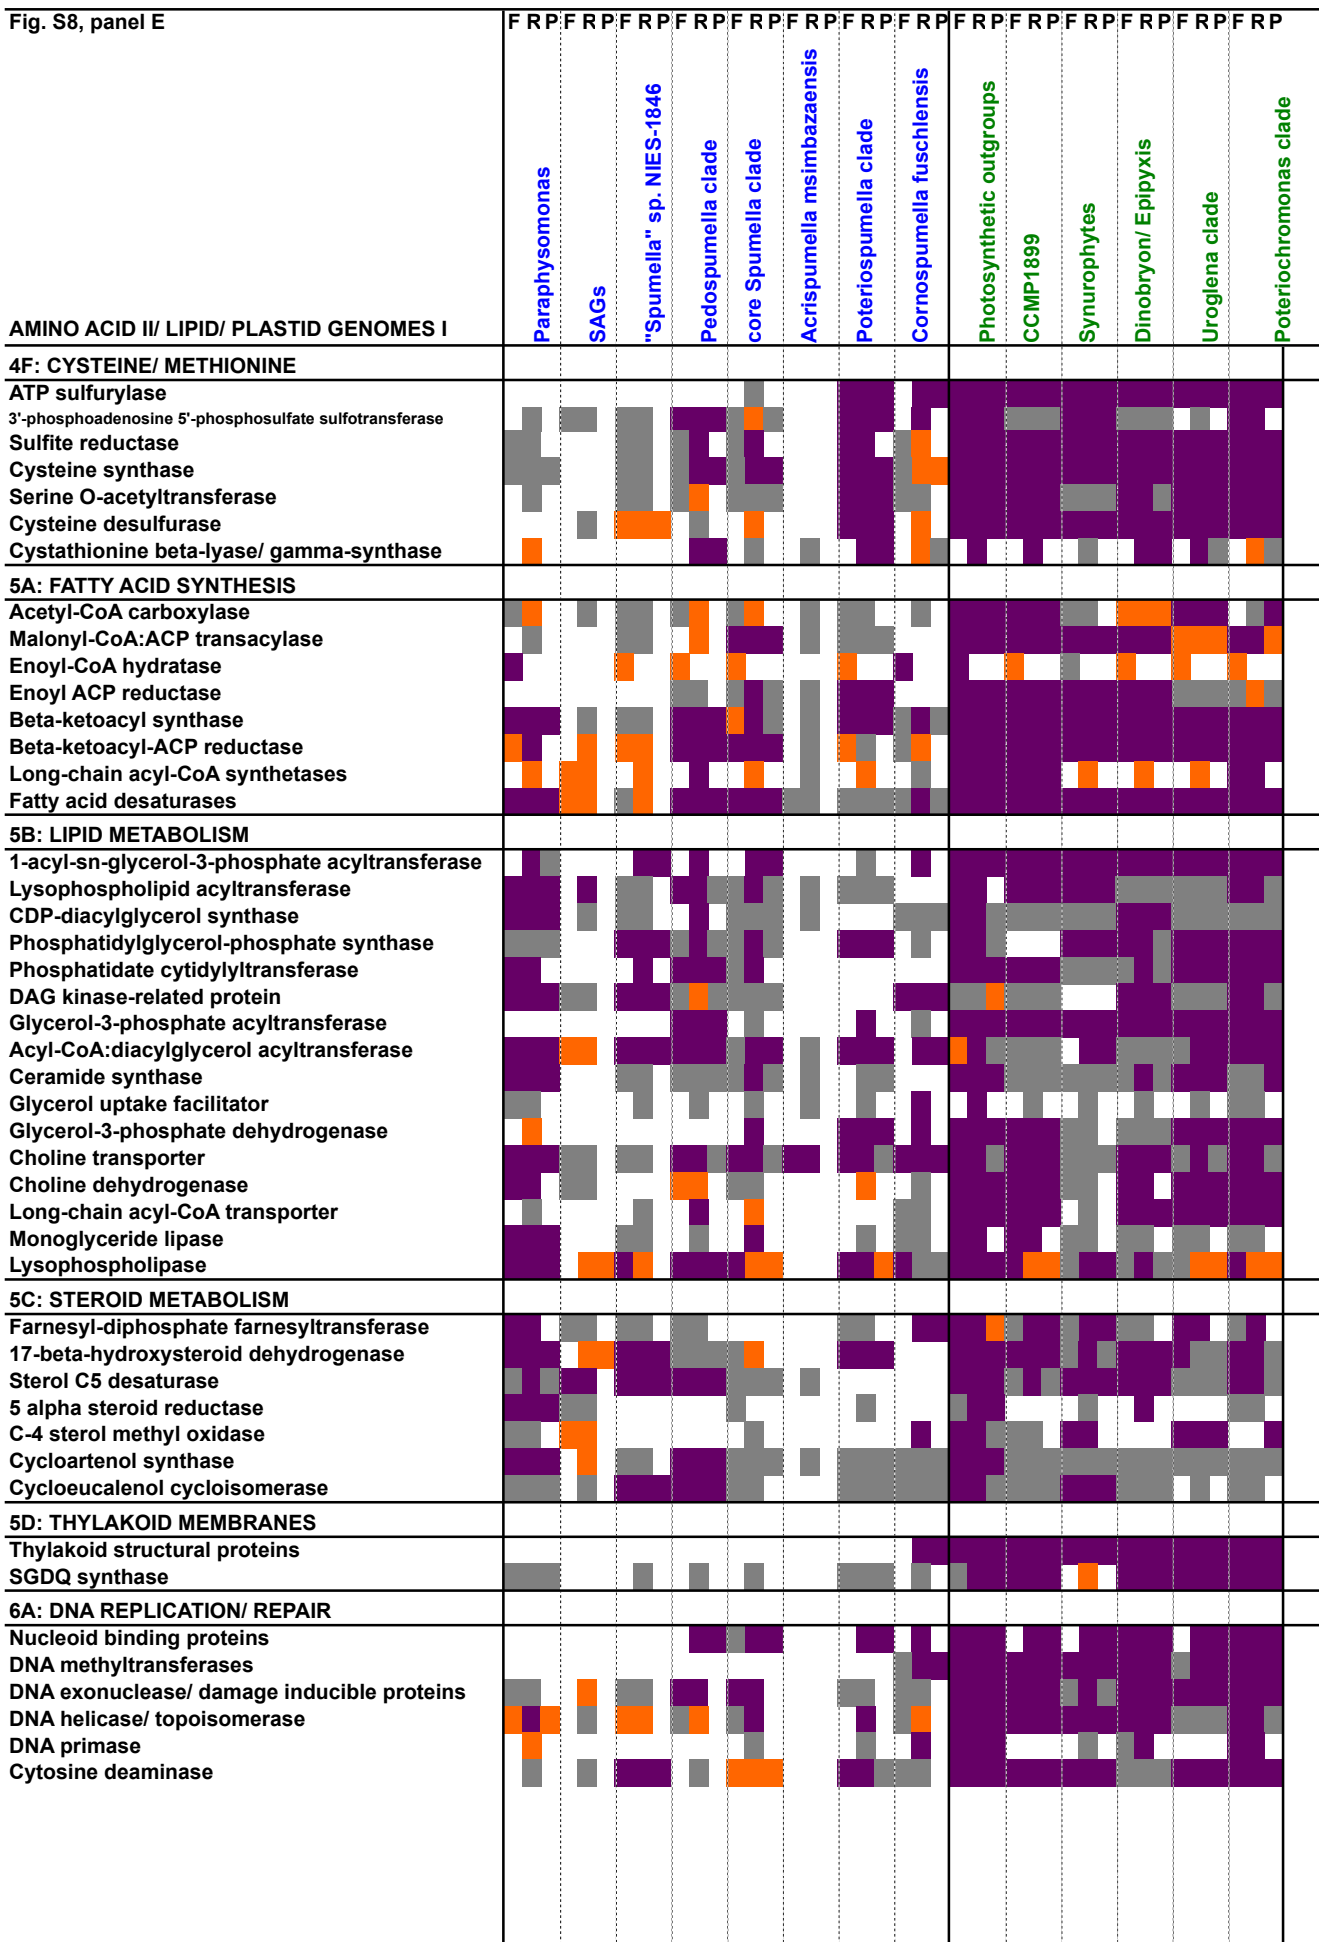

Fig. S8, panel F

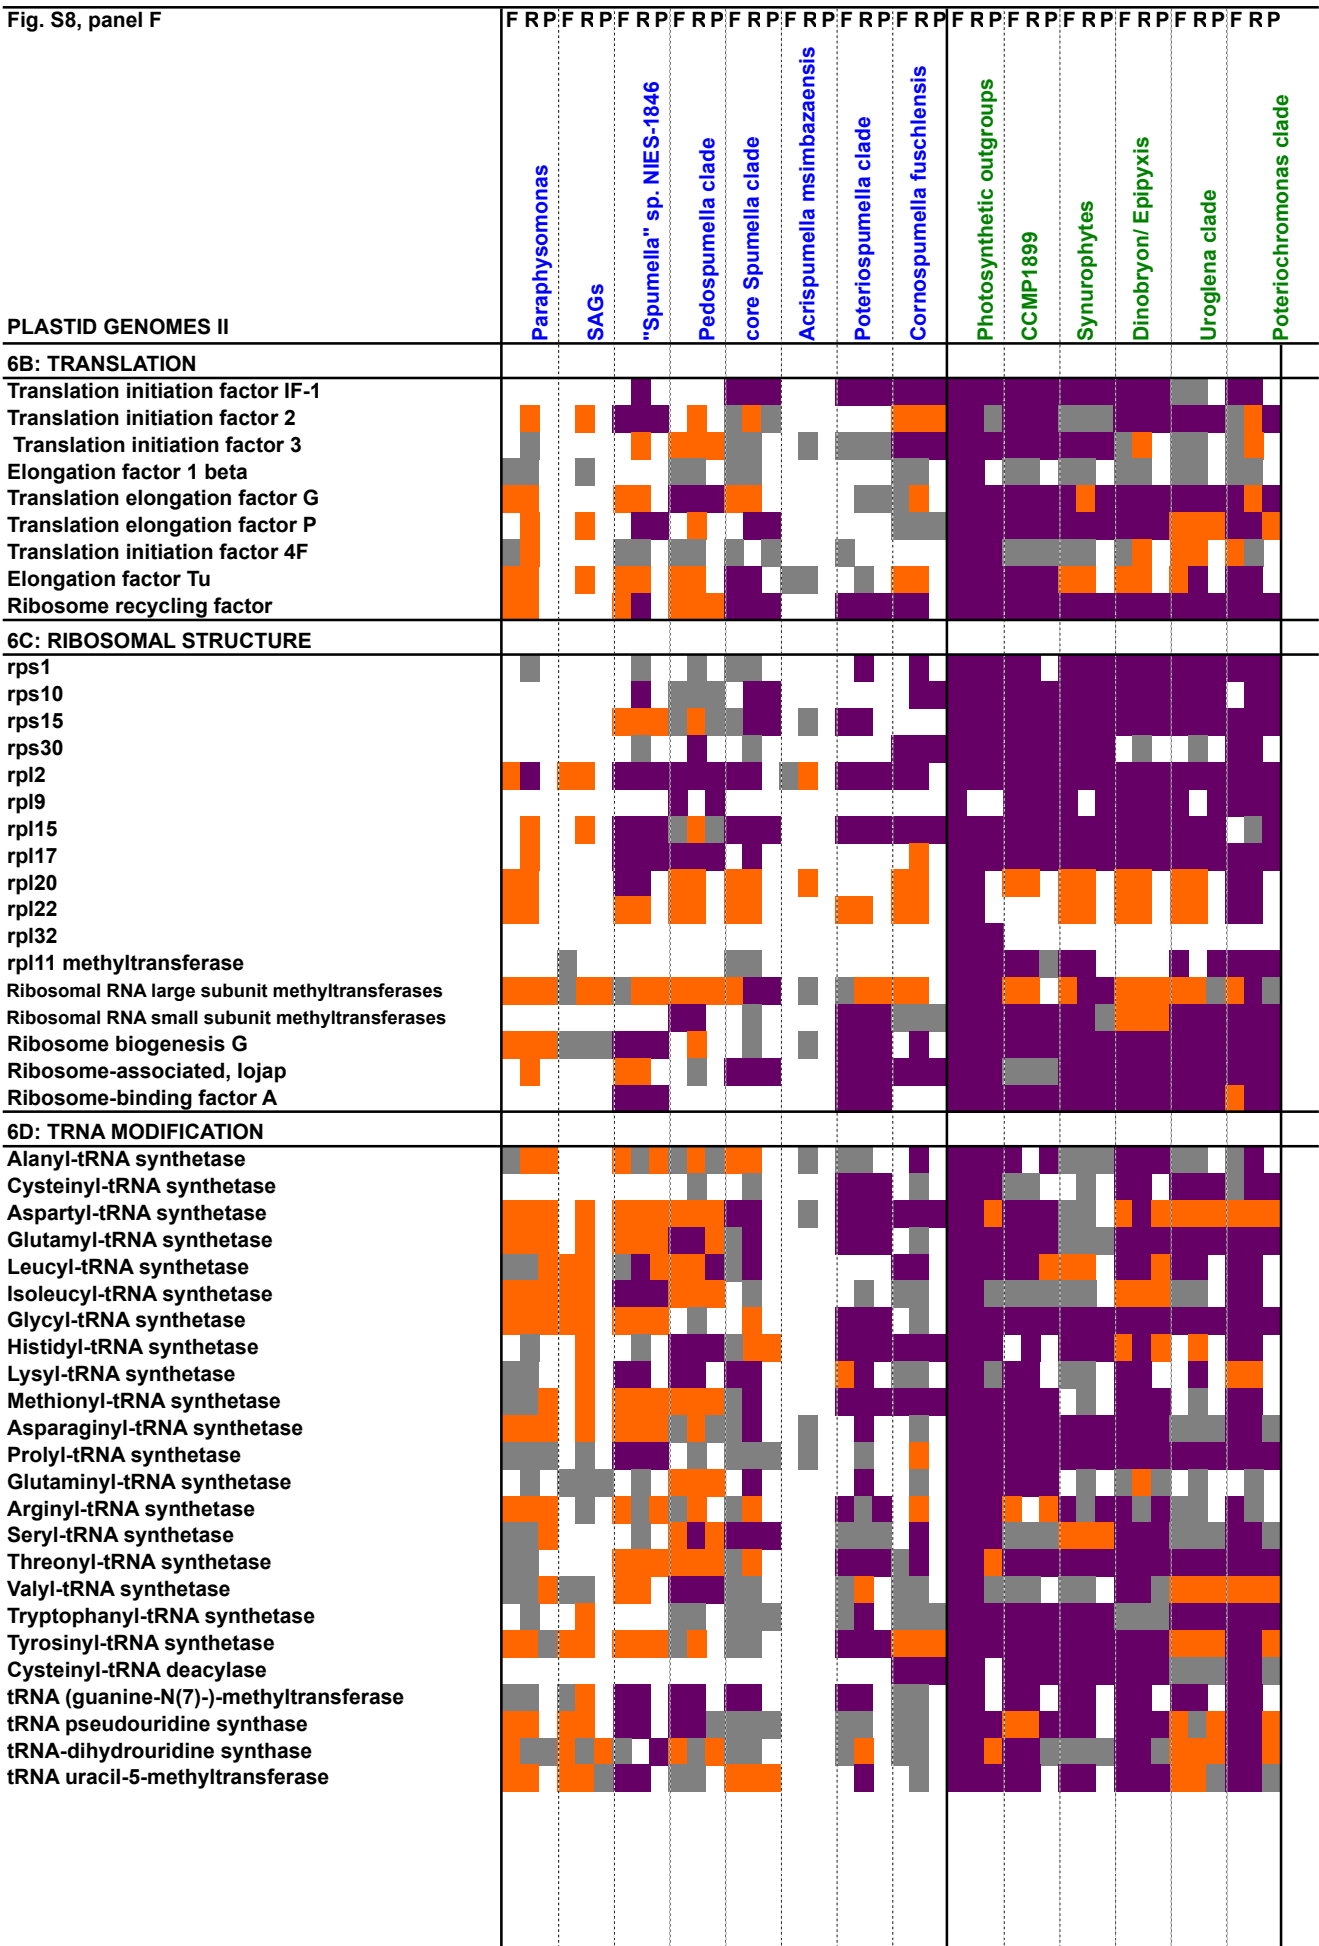



| Gene         | Queries                                                                                                                                                                                                                                                                                                                                                                                                                                                                                                                                                                                                                                                                          | PESC clade transcriptomes |  |  |  |  |  |  |  |  |  |  | <p><b>Key</b></p> <p>Photosynthetic species<br/>Non-photosynthetic species</p> <p>Protein known to be plastid-encoded (genomic query sequence)</p> <p>Transcriptome orthologue; no plastid-targeting sequence detected</p> <p>Transcriptome orthologue; plastid-targeting sequence detected</p> |  |  |  |                                    |
|--------------|----------------------------------------------------------------------------------------------------------------------------------------------------------------------------------------------------------------------------------------------------------------------------------------------------------------------------------------------------------------------------------------------------------------------------------------------------------------------------------------------------------------------------------------------------------------------------------------------------------------------------------------------------------------------------------|---------------------------|--|--|--|--|--|--|--|--|--|--|-------------------------------------------------------------------------------------------------------------------------------------------------------------------------------------------------------------------------------------------------------------------------------------------------|--|--|--|------------------------------------|
|              | <i>Nannochloropsis gaditana</i><br><i>Mallomonas splendens</i><br><i>Ochromonas CCMP1393</i><br><i>Pinguicoccus pyrenoidosus</i><br><i>Phaeomonas parva</i><br><i>Synchroma pusillum</i><br><i>Mallomonas CCMP3275</i><br><i>Synura LO234KE</i><br><i>Ochromonas CCMP1899</i><br><i>Acrispumella msimbazaensis</i><br><i>Ochromonas BG1</i><br><i>Poterioochromonas DS</i><br><i>Poteriospumella lacustris JBC07</i><br><i>Poteriospumella lacustris JBM10</i><br><i>Epipyxis PR26KG</i><br><i>Dinobryon LO226KS</i><br><i>Dinobryon UTEXLB2267</i><br><i>Uroglena WA34KE</i><br><i>undescribed CCMP2298</i><br><i>Pedospumella encystans</i><br><i>Pedospumella sinomuralis</i> |                           |  |  |  |  |  |  |  |  |  |  |                                                                                                                                                                                                                                                                                                 |  |  |  |                                    |
| <i>clpC</i>  |                                                                                                                                                                                                                                                                                                                                                                                                                                                                                                                                                                                                                                                                                  |                           |  |  |  |  |  |  |  |  |  |  |                                                                                                                                                                                                                                                                                                 |  |  |  |                                    |
| <i>secA</i>  |                                                                                                                                                                                                                                                                                                                                                                                                                                                                                                                                                                                                                                                                                  |                           |  |  |  |  |  |  |  |  |  |  |                                                                                                                                                                                                                                                                                                 |  |  |  | <b>Proteolysis</b>                 |
| <i>sufC</i>  |                                                                                                                                                                                                                                                                                                                                                                                                                                                                                                                                                                                                                                                                                  |                           |  |  |  |  |  |  |  |  |  |  |                                                                                                                                                                                                                                                                                                 |  |  |  | <b>Fe-S cluster</b>                |
| <i>rpl18</i> |                                                                                                                                                                                                                                                                                                                                                                                                                                                                                                                                                                                                                                                                                  |                           |  |  |  |  |  |  |  |  |  |  |                                                                                                                                                                                                                                                                                                 |  |  |  | <b>Translation</b>                 |
| <i>rpl20</i> |                                                                                                                                                                                                                                                                                                                                                                                                                                                                                                                                                                                                                                                                                  |                           |  |  |  |  |  |  |  |  |  |  |                                                                                                                                                                                                                                                                                                 |  |  |  |                                    |
| <i>rpl22</i> |                                                                                                                                                                                                                                                                                                                                                                                                                                                                                                                                                                                                                                                                                  |                           |  |  |  |  |  |  |  |  |  |  |                                                                                                                                                                                                                                                                                                 |  |  |  |                                    |
| <i>rpl27</i> |                                                                                                                                                                                                                                                                                                                                                                                                                                                                                                                                                                                                                                                                                  |                           |  |  |  |  |  |  |  |  |  |  |                                                                                                                                                                                                                                                                                                 |  |  |  |                                    |
| <i>rpl4</i>  |                                                                                                                                                                                                                                                                                                                                                                                                                                                                                                                                                                                                                                                                                  |                           |  |  |  |  |  |  |  |  |  |  |                                                                                                                                                                                                                                                                                                 |  |  |  |                                    |
| <i>rps13</i> |                                                                                                                                                                                                                                                                                                                                                                                                                                                                                                                                                                                                                                                                                  |                           |  |  |  |  |  |  |  |  |  |  |                                                                                                                                                                                                                                                                                                 |  |  |  |                                    |
| <i>rps16</i> |                                                                                                                                                                                                                                                                                                                                                                                                                                                                                                                                                                                                                                                                                  |                           |  |  |  |  |  |  |  |  |  |  |                                                                                                                                                                                                                                                                                                 |  |  |  |                                    |
| <i>rps17</i> |                                                                                                                                                                                                                                                                                                                                                                                                                                                                                                                                                                                                                                                                                  |                           |  |  |  |  |  |  |  |  |  |  |                                                                                                                                                                                                                                                                                                 |  |  |  |                                    |
| <i>rps5</i>  |                                                                                                                                                                                                                                                                                                                                                                                                                                                                                                                                                                                                                                                                                  |                           |  |  |  |  |  |  |  |  |  |  |                                                                                                                                                                                                                                                                                                 |  |  |  |                                    |
| <i>tsf</i>   |                                                                                                                                                                                                                                                                                                                                                                                                                                                                                                                                                                                                                                                                                  |                           |  |  |  |  |  |  |  |  |  |  |                                                                                                                                                                                                                                                                                                 |  |  |  |                                    |
| <i>tufA</i>  |                                                                                                                                                                                                                                                                                                                                                                                                                                                                                                                                                                                                                                                                                  |                           |  |  |  |  |  |  |  |  |  |  |                                                                                                                                                                                                                                                                                                 |  |  |  |                                    |
| <i>petA</i>  |                                                                                                                                                                                                                                                                                                                                                                                                                                                                                                                                                                                                                                                                                  |                           |  |  |  |  |  |  |  |  |  |  |                                                                                                                                                                                                                                                                                                 |  |  |  | <b>Electron transport</b>          |
| <i>petF</i>  |                                                                                                                                                                                                                                                                                                                                                                                                                                                                                                                                                                                                                                                                                  |                           |  |  |  |  |  |  |  |  |  |  |                                                                                                                                                                                                                                                                                                 |  |  |  |                                    |
| <i>petJ</i>  |                                                                                                                                                                                                                                                                                                                                                                                                                                                                                                                                                                                                                                                                                  |                           |  |  |  |  |  |  |  |  |  |  |                                                                                                                                                                                                                                                                                                 |  |  |  |                                    |
| <i>psaE</i>  |                                                                                                                                                                                                                                                                                                                                                                                                                                                                                                                                                                                                                                                                                  |                           |  |  |  |  |  |  |  |  |  |  |                                                                                                                                                                                                                                                                                                 |  |  |  |                                    |
| <i>psbW</i>  |                                                                                                                                                                                                                                                                                                                                                                                                                                                                                                                                                                                                                                                                                  |                           |  |  |  |  |  |  |  |  |  |  |                                                                                                                                                                                                                                                                                                 |  |  |  |                                    |
| <i>frb</i>   |                                                                                                                                                                                                                                                                                                                                                                                                                                                                                                                                                                                                                                                                                  |                           |  |  |  |  |  |  |  |  |  |  |                                                                                                                                                                                                                                                                                                 |  |  |  |                                    |
| <i>atpA</i>  |                                                                                                                                                                                                                                                                                                                                                                                                                                                                                                                                                                                                                                                                                  |                           |  |  |  |  |  |  |  |  |  |  |                                                                                                                                                                                                                                                                                                 |  |  |  |                                    |
| <i>atpB</i>  |                                                                                                                                                                                                                                                                                                                                                                                                                                                                                                                                                                                                                                                                                  |                           |  |  |  |  |  |  |  |  |  |  |                                                                                                                                                                                                                                                                                                 |  |  |  |                                    |
| <i>dnaK</i>  |                                                                                                                                                                                                                                                                                                                                                                                                                                                                                                                                                                                                                                                                                  |                           |  |  |  |  |  |  |  |  |  |  |                                                                                                                                                                                                                                                                                                 |  |  |  | <b>Chaperone</b>                   |
| <i>dnaB</i>  |                                                                                                                                                                                                                                                                                                                                                                                                                                                                                                                                                                                                                                                                                  |                           |  |  |  |  |  |  |  |  |  |  |                                                                                                                                                                                                                                                                                                 |  |  |  |                                    |
| <i>ilvB</i>  |                                                                                                                                                                                                                                                                                                                                                                                                                                                                                                                                                                                                                                                                                  |                           |  |  |  |  |  |  |  |  |  |  |                                                                                                                                                                                                                                                                                                 |  |  |  | <b>Amino acid synthesis</b>        |
| <i>cbbX</i>  |                                                                                                                                                                                                                                                                                                                                                                                                                                                                                                                                                                                                                                                                                  |                           |  |  |  |  |  |  |  |  |  |  |                                                                                                                                                                                                                                                                                                 |  |  |  | <b>CO<sub>2</sub> fixation</b>     |
| <i>chlI</i>  |                                                                                                                                                                                                                                                                                                                                                                                                                                                                                                                                                                                                                                                                                  |                           |  |  |  |  |  |  |  |  |  |  |                                                                                                                                                                                                                                                                                                 |  |  |  | <b>Haem/chlorophyll metabolism</b> |
| <i>ftsH</i>  |                                                                                                                                                                                                                                                                                                                                                                                                                                                                                                                                                                                                                                                                                  |                           |  |  |  |  |  |  |  |  |  |  |                                                                                                                                                                                                                                                                                                 |  |  |  | <b>Plastid division</b>            |
| <i>ycf36</i> |                                                                                                                                                                                                                                                                                                                                                                                                                                                                                                                                                                                                                                                                                  |                           |  |  |  |  |  |  |  |  |  |  |                                                                                                                                                                                                                                                                                                 |  |  |  | <b>Other</b>                       |
| <i>syfB</i>  |                                                                                                                                                                                                                                                                                                                                                                                                                                                                                                                                                                                                                                                                                  |                           |  |  |  |  |  |  |  |  |  |  |                                                                                                                                                                                                                                                                                                 |  |  |  |                                    |

**Fig. S9. Plastid-encoded functions detected in PESC clade transcriptomes.**

This heatmap shows the distribution of sequences orthologous to genes in published chrysophyte plastid genomes that are detectable through reciprocal BLAST and alignment in published PESC clade transcriptomes. The left hand three columns show the distribution of these proteins encoded in three completed PESCclade plastid genome sequences. Some of the sequences identified may correspond to fragments of plastid-encoded transcripts that survived poly(A) selection within the corresponding transcriptome; others may correspond to nucleus-encoded transcripts of plastid origin, identifiable by the presence of N-terminal targeting sequences. Plastid-encoded genes, and taxa for which no such orthologous sequences could be found (e.g. *Paraphysomonas sp.*) are not shown.



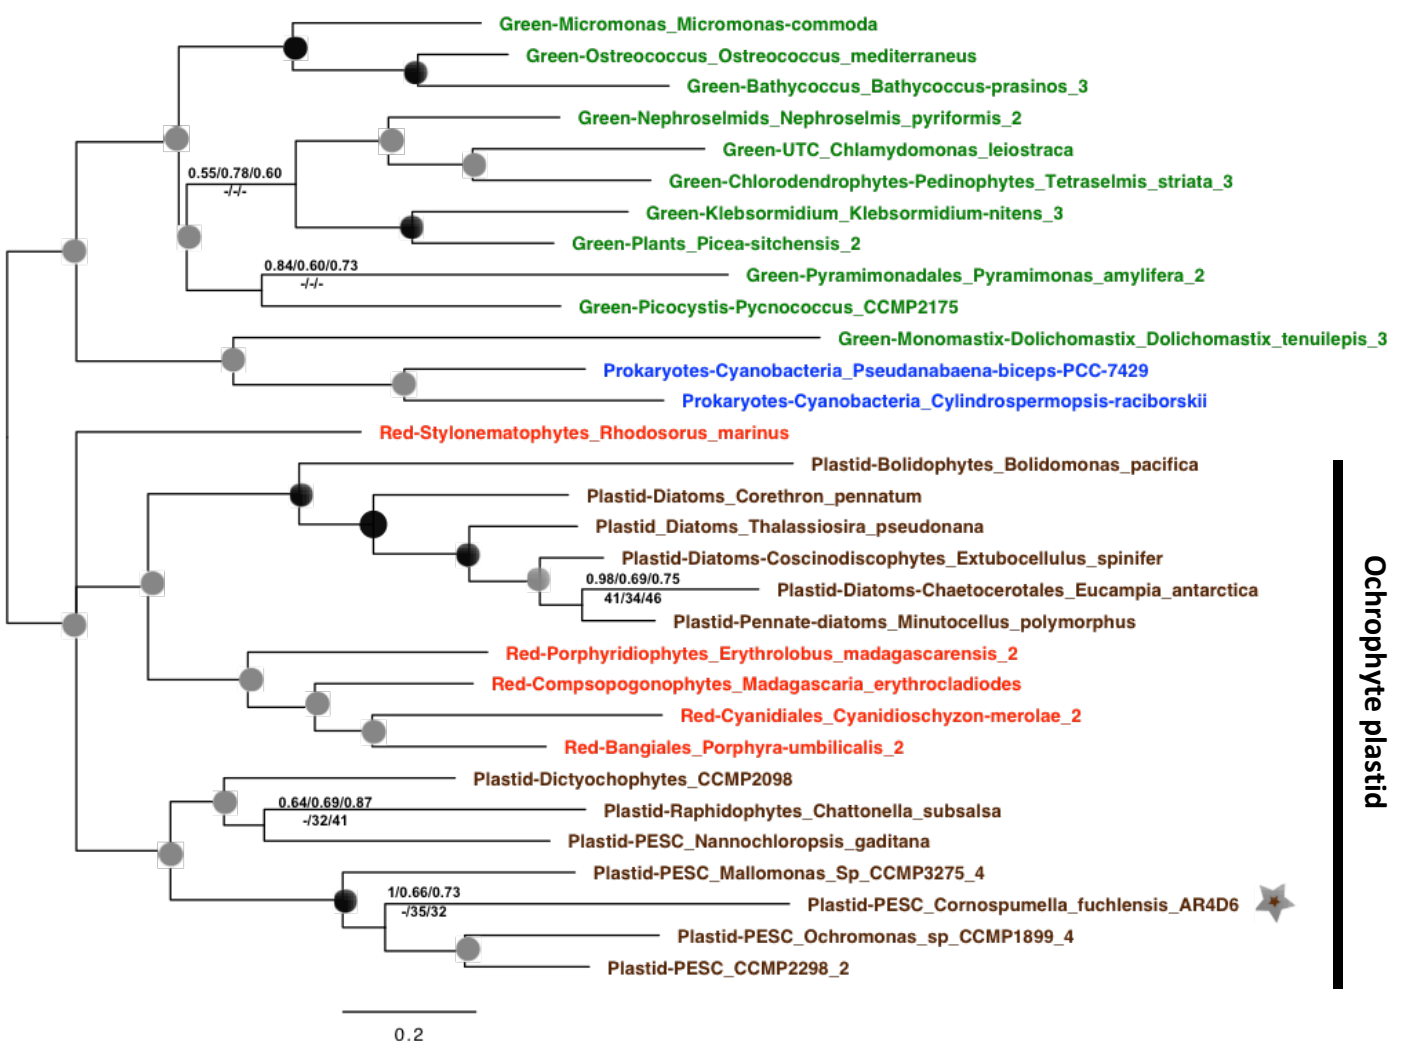

### Key

Ochrophyte plastid-targeted protein

Red algae

Green algae

Prokaryote

★ Plastid-derived protein retained in non-photosynthetic chrysophyte

● Node with strong support (Bayesian PP = 1.0, and RAxML best tree bootstrap support > 80% in all alignments tested)

● Node with moderate support (Bayesian PP > 0.8, or RAxML best tree bootstrap support > 50% in 2/3 alignments tested)

A/B/C Consensus support: Bayesian PP (GTR/ Jones/ WAG)  
 x/y/z RAxML bootstrap (GTR/ JTT/ WAG)

**Fig. S10. Consensus tree of PESC clade PsbP sequences.**

This tree shows the Bayesian consensus topology inferred for a 31 taxa x 96 aa alignment corresponding to a plastid-targeted PsbP-type protein identified across PESC clade members. Only proteins from ochrophytes with inferred plastid-targeting sequences; red algae, green algae, and prokaryotes are shown. Sequences are labelled by taxonomic origin, and a paraphyletic clade of ochrophyte-plastid targeted sequences are labelled with a horizontal bar. A plastid-targeted protein of clear chrysophyte origin, retained in the non-photosynthetic species *Cornospumella fuschlensis*, is asterisked.

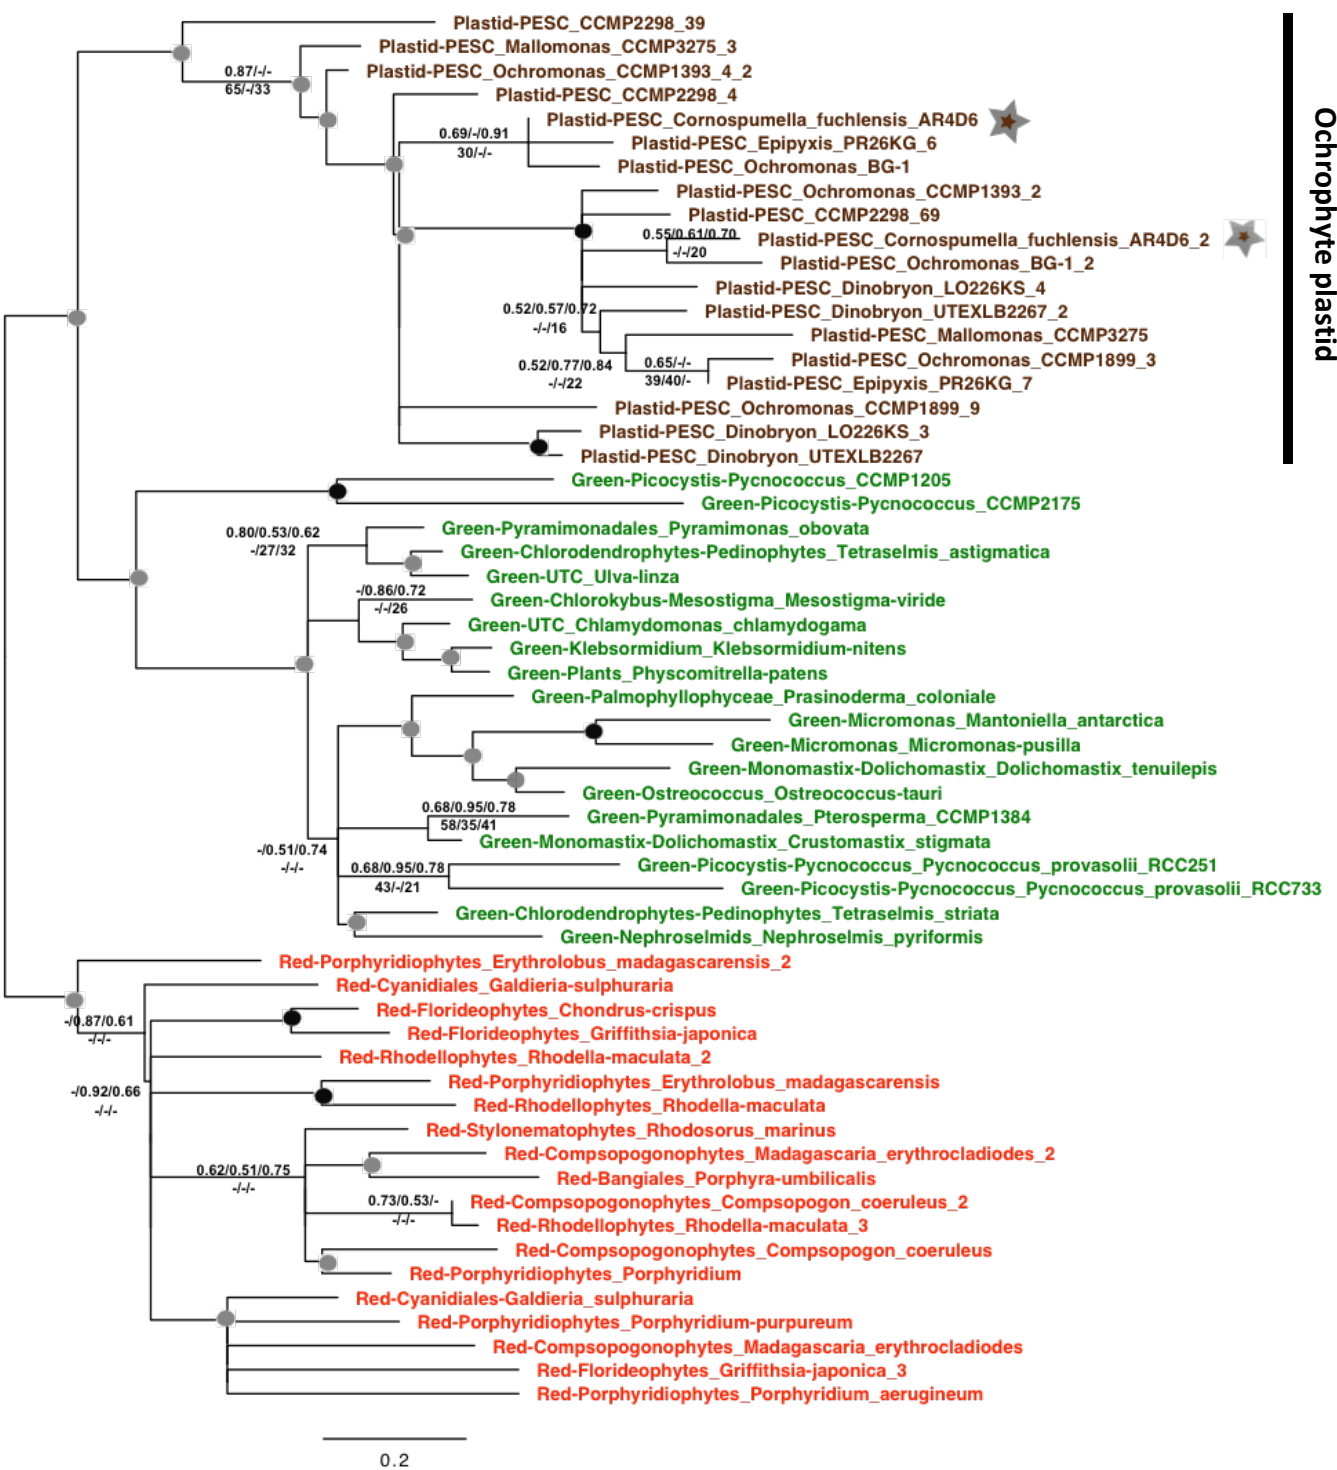

**Key**

Ochrophyte plastid-targeted protein

Red algae

Green algae

★ Plastid-derived protein retained in non-photosynthetic chrysophyte

● Node with strong support (Bayesian PP = 1.0, and RAxML best tree bootstrap support > 80% in all alignments tested)

● Node with moderate support (Bayesian PP > 0.8, or RAxML best tree bootstrap support > 50% in 2/3 alignments tested)

A/B/C Consensus support: Bayesian PP (GTR/ Jones/ WAG)  
 x/y/z RAxML bootstrap (GTR/ JTT/ WAG)

**Fig. S11. Consensus tree of PESC clade LI818/ Lhcx sequences.**

This tree shows the Bayesian consensus topology inferred for a 58 taxa x 72 aa alignment corresponding to a plastid-targeted Lhcx/Li818-type protein identified across PESC clade members, shown as per fig. S10.

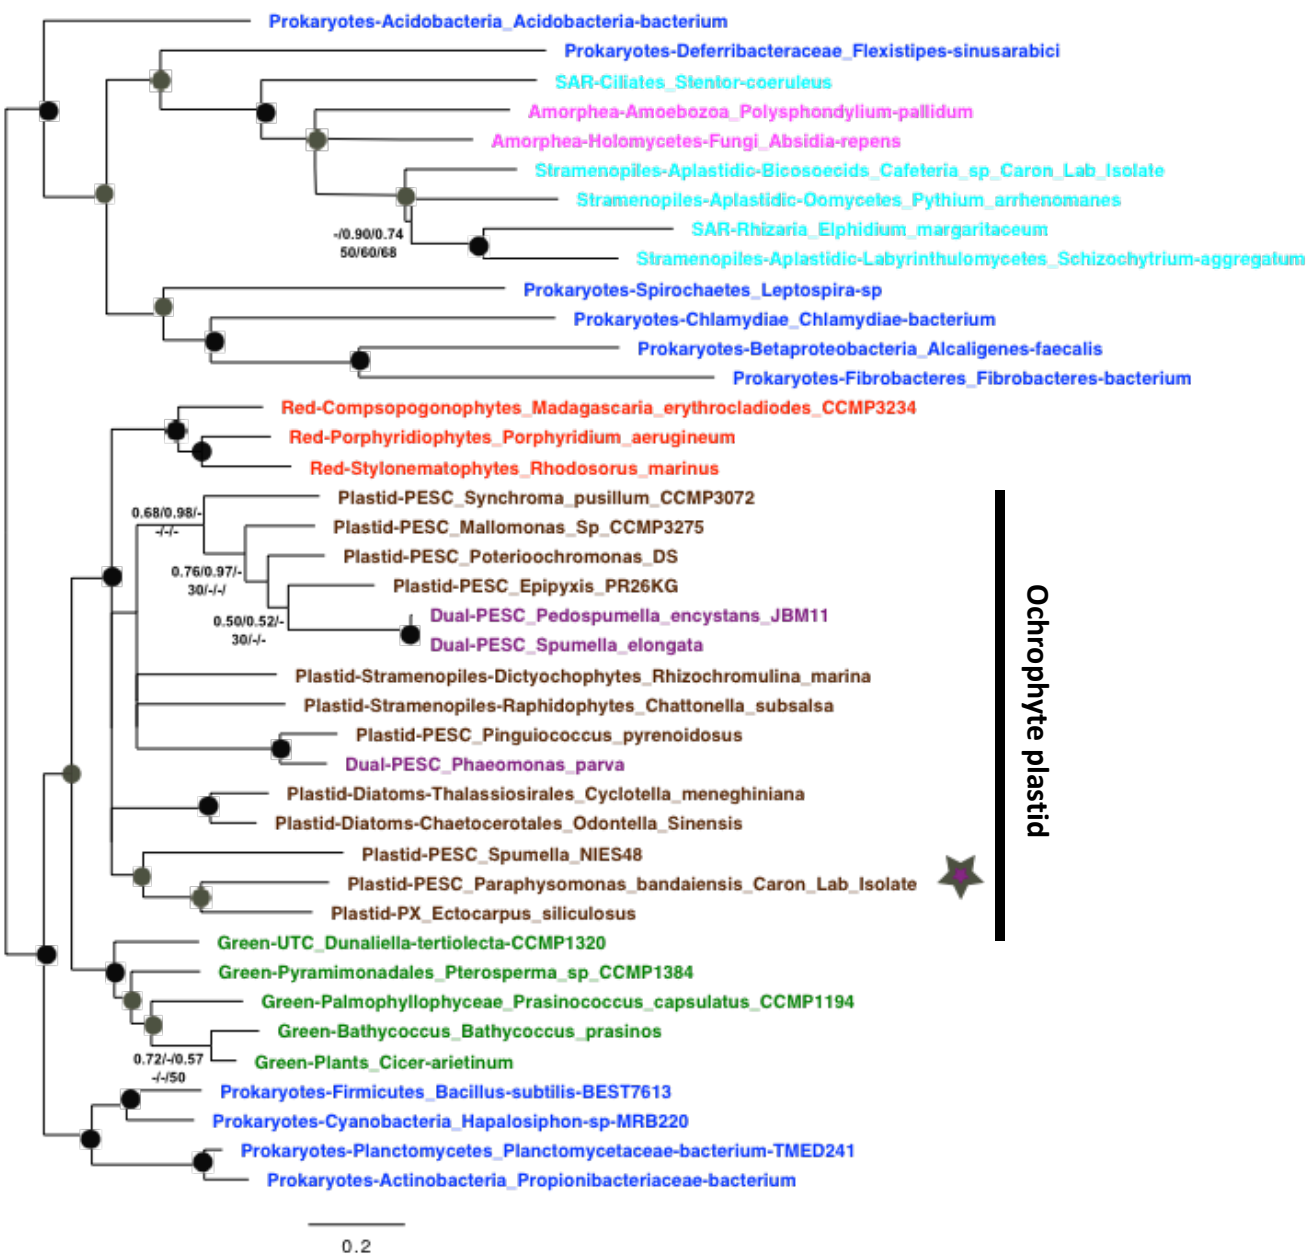

**Key**

- Ochrophyte plastid-targeted protein
  - Ochrophyte dual plastid/ mitochondria-targeted protein
  - Red algae
  - Green algae
  - Prokaryote
  - Plastid-lacking SAR clade member
  - Other aplastidic eukaryote
- ★ Plastid-derived protein retained in *Paraphysomonas* sp.
- Node with strong support (Bayesian PP = 1.0, and RAxML best tree bootstrap support > 80% in all alignments tested)
  - Node with moderate support (Bayesian PP > 0.8, or RAxML best tree bootstrap support > 50% in 2/3 alignments tested)
- A/B/C Consensus support: Bayesian PP (GTR/ Jones/ WAG)  
x/y/z RAxML bootstrap (GTR/ JTT/ WAG)

**Fig. S12. Consensus tree of PESC ferrocyclase sequences**  
 This tree shows the Bayesian consensus topology inferred for a 40 taxa x 318 aa alignment corresponding to ferrocyclase sequences from across the tree of life. Ochrophyte sequences are shaded by predicted subcellular localisation, and all remaining sequences are shade by taxonomy. The ochrophyte sequences, which include a plastid-targeted protein from *Paraphysomonas*, resolve as a monophyletic clade with other plastid-bearing eukaryotes, separate to the mitochondrial/ cytoplasmic-type enzymes found in plastid-lacking members of the SAR clade (oomycetes, ciliates, rhizarians) and opisthokonts.

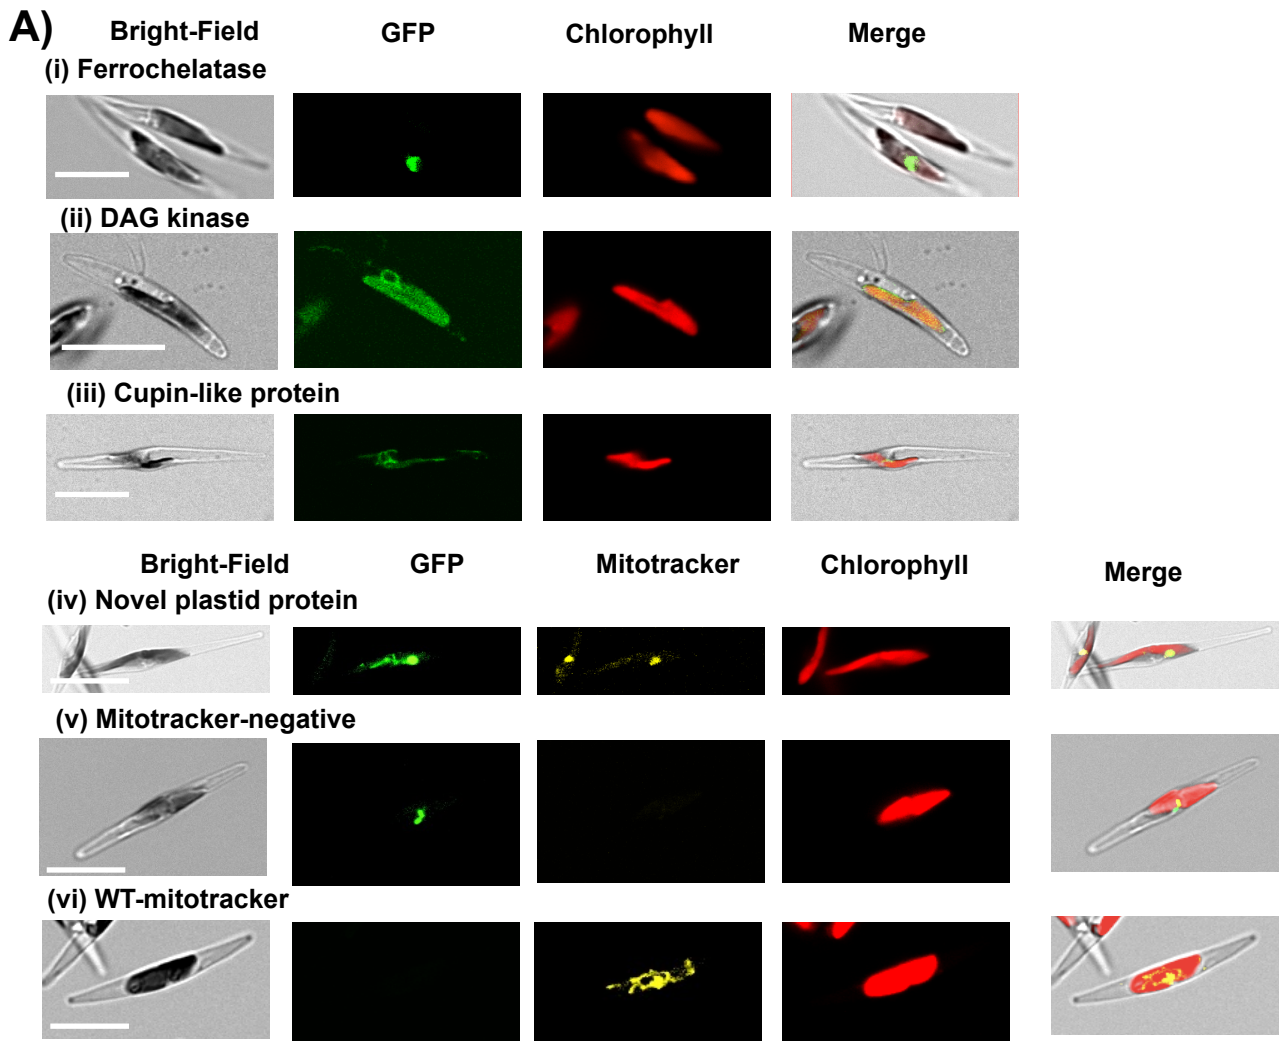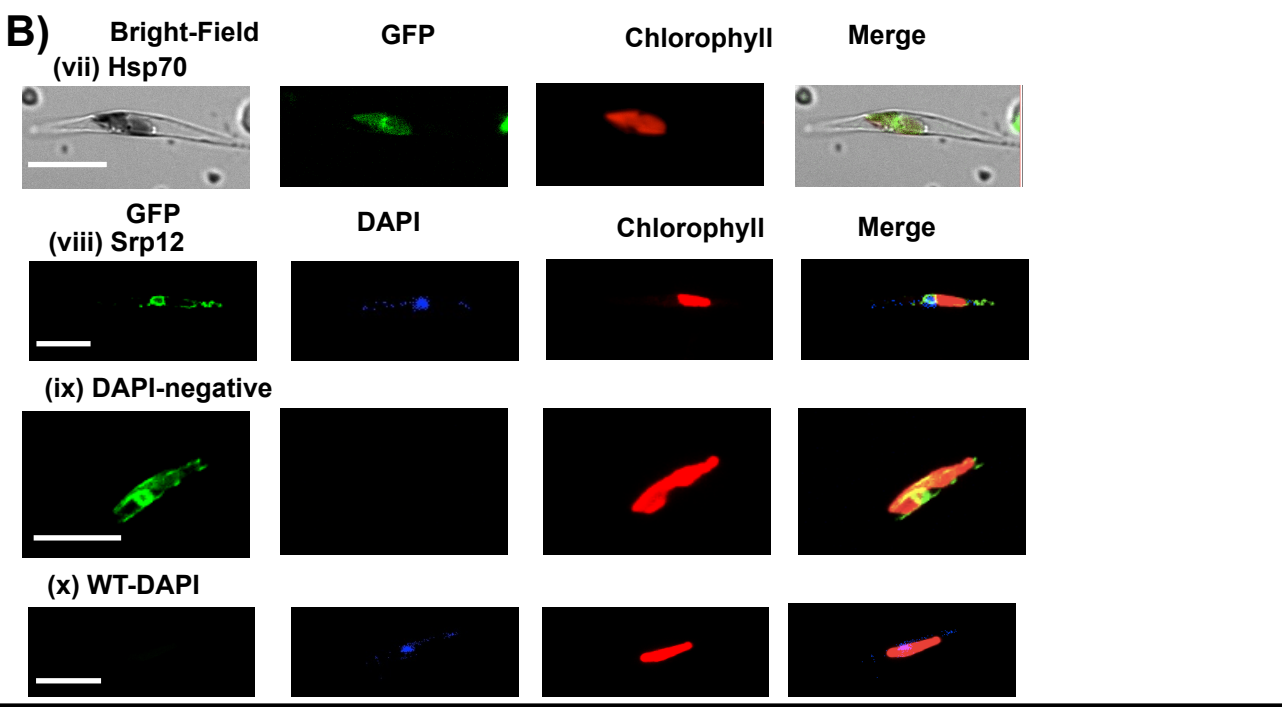

**Fig. S13. Exemplar plastid-targeted proteins in *Paraphysomonas*.**  
**A** : images of *Phaeodactylum* lines transformed with GFP-linked constructs of the N-terminal regions of proteins associated with *Paraphysomonas bandaiensis* plastid metabolism: (i) Ferrochelatase (haem synthesis), (ii) DAG kinase (lipid metabolism), (iii, iv) two novel protein widely conserved across ochrophyte plastid proteomes (Dorrell et al., 2017). Each construct localises to the periplastid compartment (i) other regions within the *Phaeodactylum* plastid (ii, iii); or dual localises to the plastid and mitochondria (iv), as verified by Mitotracker Orange (v-vi). **B**: heterologous expression GFP-linked constructs of the N-terminal regions of *Paraphysomonas bandaiensis* plastid protein import subunits: Hsp70, which localises to the periplastid compartment (vii), and Srp12 (viii), which localises to the plastid endoplasmic reticulum, as verified with DAPI staining (ix, x). Scale bars are to 10  $\mu\text{m}$ .

A)

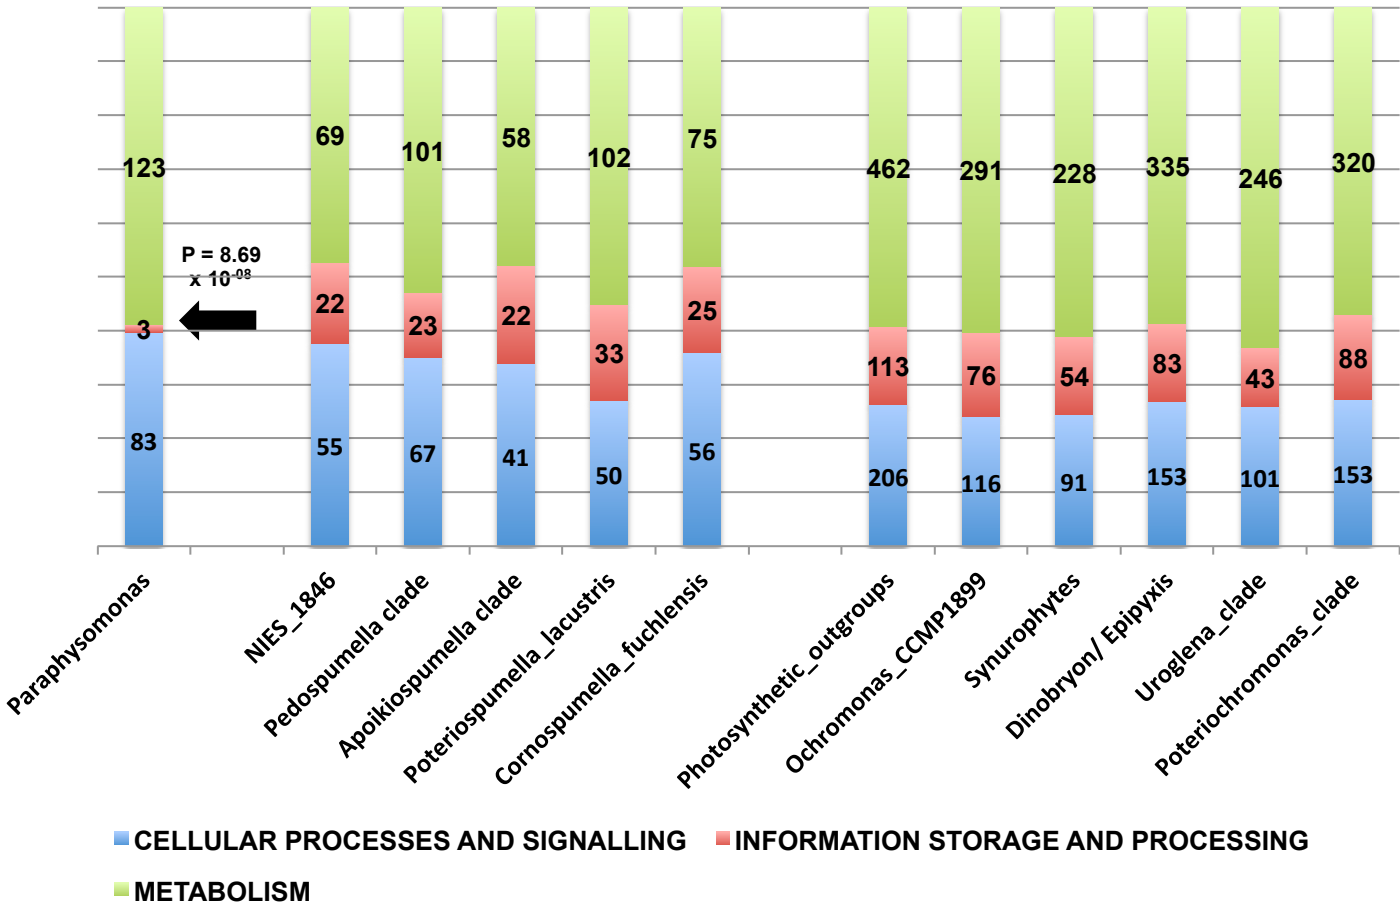

B)

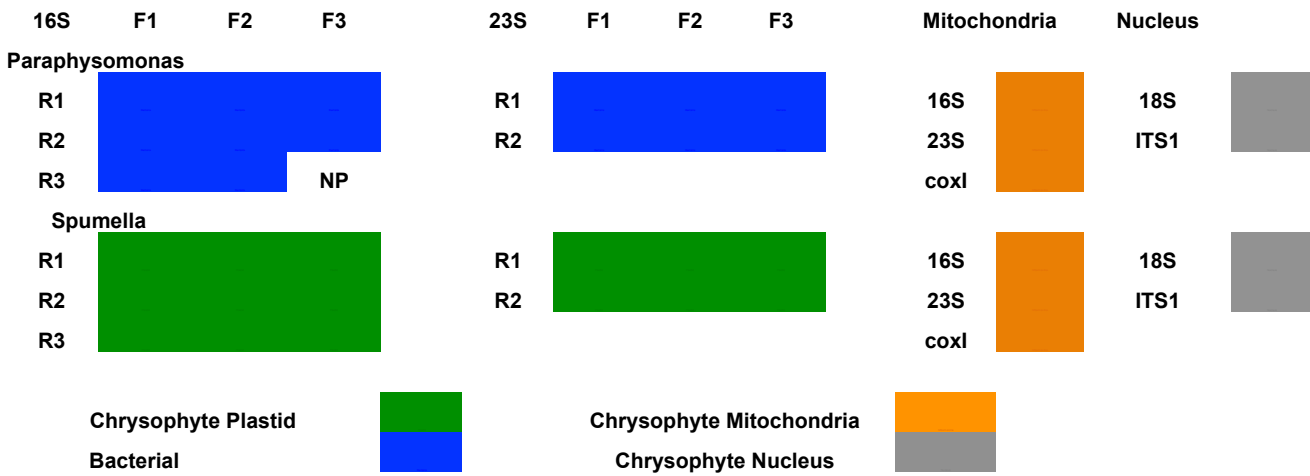

**Fig. S14. Evidence for loss of the *Paraphysomonas* plastid genome.**

**A:** KOG family distribution of plastid-targeted orthologues of different ochrophyte plastid-targeted proteins identified in PESC clade members. *Paraphysomonas* possesses substantially fewer proteins with potential KOG functions associated with information storage and processing related functions than any other PESC clade group considered. **B:** results of PCRs using consensus primers designed against chrysophyte plastid, mitochondrial, and nuclear genomes, for *Paraphysomonas bandaiensis* RCC383 and *Spumella elongata* CCAP955/1. Products are shaded by evolutionary origin as inferred by BLAST; « NP » indicates no product was obtained for a given reaction even with reduced annealing temperatures ( $>15^{\circ}\text{C}$  below the primer melt temperatures) and two successive rounds of PCR, using the primary reaction product as a template for the second round of amplification. Although mitochondrial and nuclear DNA could be amplified for both species, a plastid genome was only identifiable for *S. elongata*. PCRs of plastid contigs for *P. bandaiensis* only yielded bacterial (*Marinobacter*, *Labrenzia*) contaminants, consistent with an absence of plastid DNA.

### Paraphysomonas Asp-tRNA synthetase

cgtaactctgcag<sup>taa</sup>tttgaa<sup>atgtggcgtgcagtcataagggccacagtaagagaaacggctcgtatacacgccttaaaacgagcaccggcccttgatggagaagtacacaggcaccatggctgtctgctacttatcgtcac</sup>  
V T L Q - F E M W R A V I R A T V R E T A R I H A L K R A P A L V W R S T Q A P W L S A T Y R H

### Paraphysomonas Glu-tRNA synthetase

tatatgtactgctgctgtgtatataatgcatctgtatggt<sup>taa</sup>gcccaagttagtctatctcacaatacc<sup>atgaaacccctccccctccttcaactcttaacacttctcttcattgcttttatctctttccacatcactacgtacacata</sup>  
Y M Y C C C V Y M H L Y G - A Q V S L S H N T M K P L P L L H L T L L F M L L S L S T S L R T H

### Paraphysomonas Ile-tRNA synthetase

gtagtgagatcgtacatcgtat<sup>tga</sup>agtaaatctggagatcaacat<sup>atggctcccgatgtcattgaaagcaagtacaaaatacgtgtataaggacagtcgatcattgttataccttattgaatgctgattctctgttatttt</sup>  
V V R S Y I V - S K S G D Q H M A P D V I E S K Y K I S C I R T V D H L L S L L N A D F S V V F

### Paraphysomonas Met-tRNA synthetase

gataaactctccgtgccaaacaat<sup>tga</sup>gtgtactcatcc<sup>atggactacttgacatcagacgagtgccgacagccctatcatgcactgtattatgcgataatgtgatcattgaaccagagagtgacaatccctctctctctc</sup>  
D K L S V P N N - V Y S S M D Y L T S D E C G T A L S C T V L C D N V I I E P E S E Q S P L S S

### Paraphysomonas Gly-tRNA synthetase

agtggc<sup>tga</sup>gtcttccgagtcattgatccgcgatatcattcccttcatgtctacctgtgcttgcacagcag<sup>atgtcattgogattaagtcagcatatgttggatgctcggctogagtagaagactgctccgaaccataaccagac</sup>  
S G - V F R V I D P R Y H S L H A T C A C I S S M S L R L S A A Y F D A R S S R R L L R T I T R

**Fig. S15. 5' UTR sequences of five amino acyl-tRNA synthetases of *Paraphysomonas* determined by TAIL-PCRs**

Deduced coding regions are highlighted in red and are predicted to have N-terminal mitochondrial targeting sequences (see also Fig. S4). In-frame terminal codons are highlighted in grey. The “ATG” codons deduced as the initiation codons here are actually the first methionine codons appeared downstream from the in-frame termination codons. This indicates that the *Paraphysomonas* amino acyl-tRNA synthetases with the N-terminal mitochondrial targeting sequences do not have any additional signal peptide at the upstream regions.

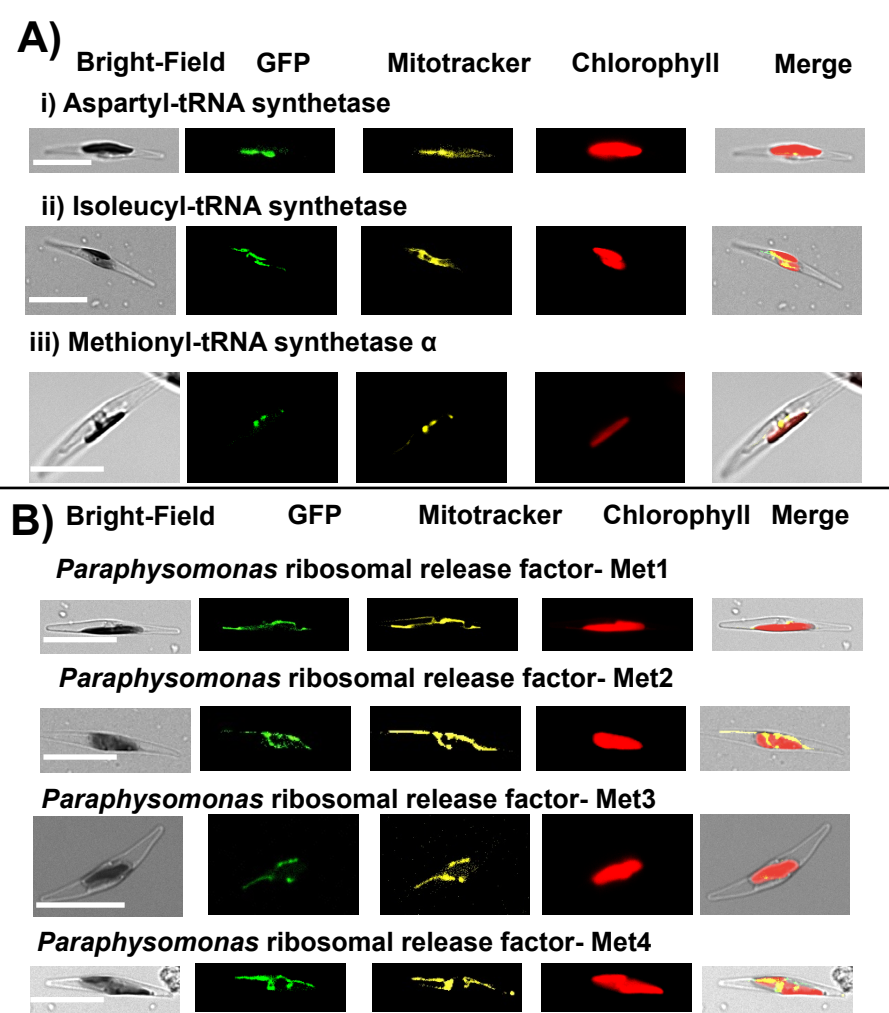

**Fig. S16. Mitochondrial retargeting of proteins previously associated with the *Paraphysomonas* plastid genome.** **A:** images of *Phaeodactylum* lines transformed with GFP-linked constructs of the N-terminal regions of *Paraphysomonas bandaiensis* aminoacyl-tRNA synthetases identified by phylogeny to previously have functioned in the expression of the plastid genome, stained with Mitotracker Orange. Each construct localises unilaterally to the mitochondria. **B:** analogous images for a mitochondrion-targeted *Paraphysomonas* ribosomal release factor of mitochondrial evolutionary origin. Separate images are provided for four candidate translation initiation codons upstream of the CDD, as per fig. 4B. Stain- and GFP-negative controls for each image are shown in Fig. S13B. Scale bars are to 10  $\mu$ m.

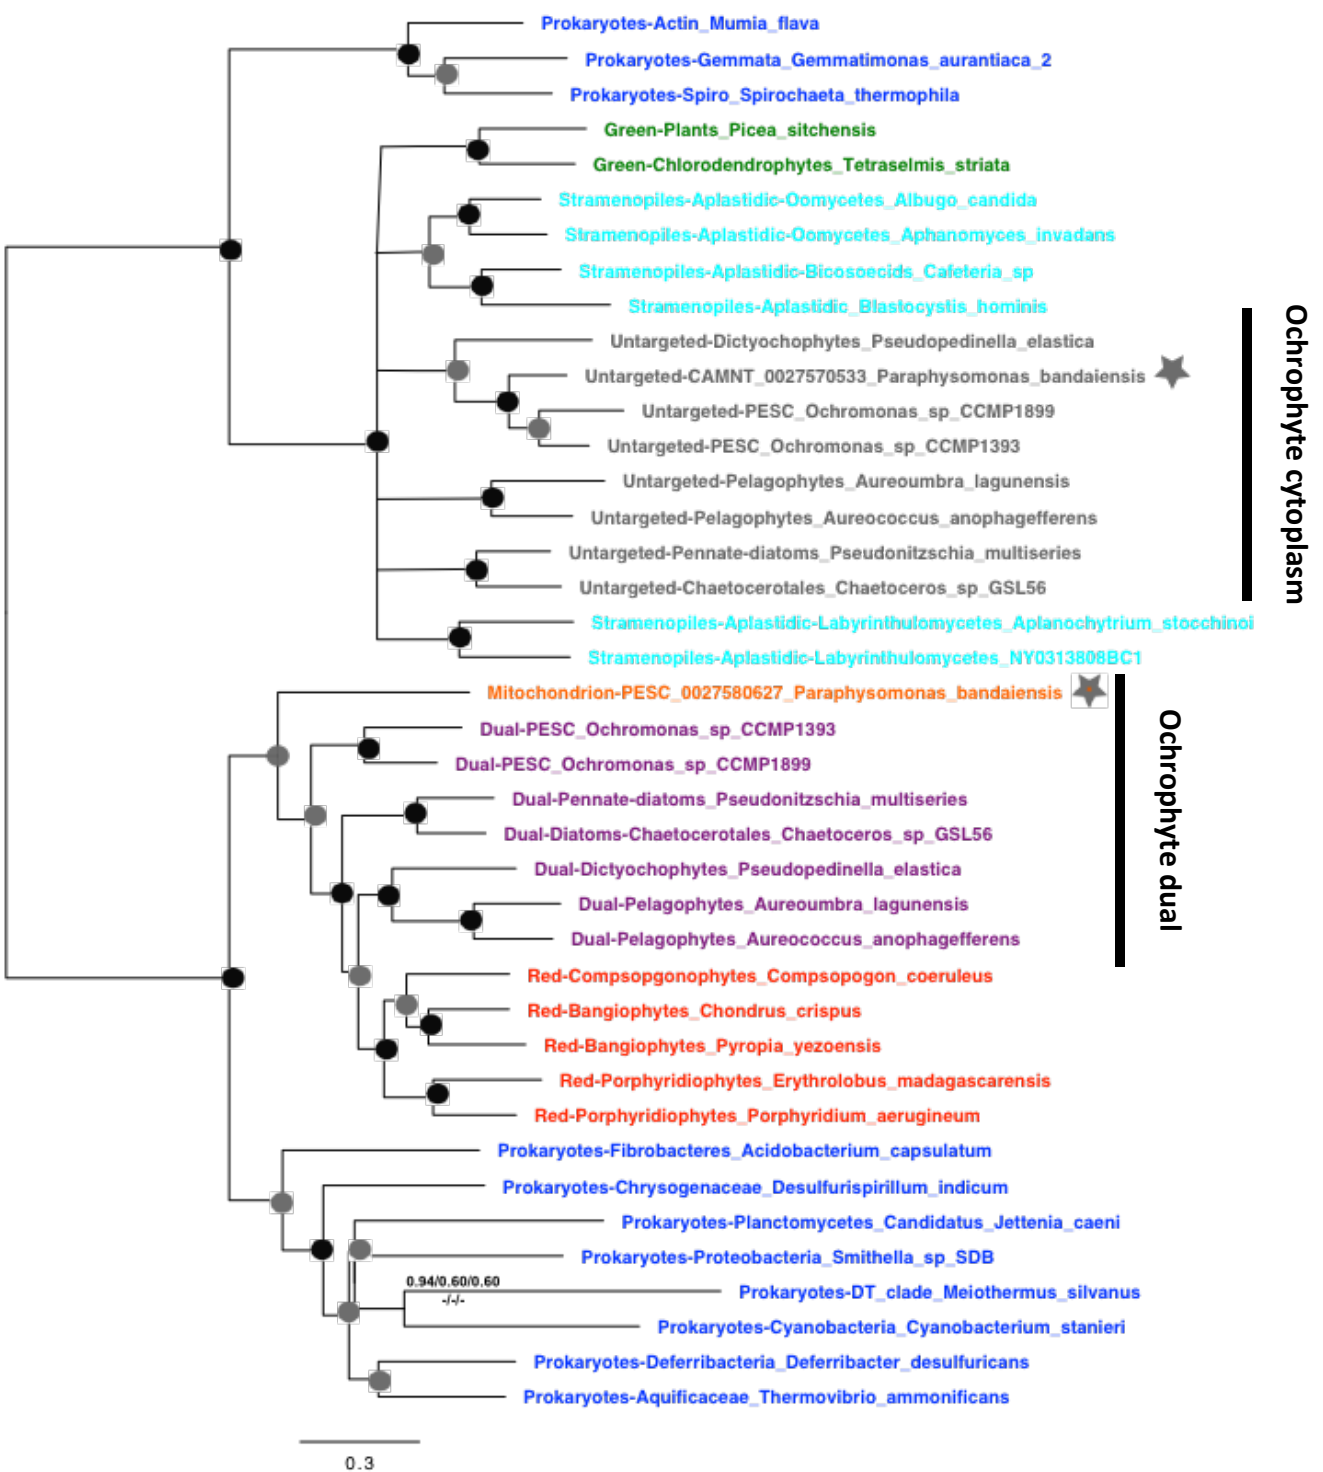

### Key

Ochrophyte mitochondria-targeted protein  
 Ochrophyte dual plastid/ mitochondria-targeted protein  
 Ochrophyte cytoplasmic/ untargeted protein  
 Red algae  
 Green algae  
 Prokaryote  
 Plastid-lacking SAR clade member

★ Plastid-derived protein retained in *Paraphysomonas* sp.

● Node with strong support (Bayesian PP = 1.0, and RAxML best tree bootstrap support > 80% in all alignments tested)  
 ● Node with moderate support (Bayesian PP > 0.8, or RAxML best tree bootstrap support > 50% in 2/3 alignments tested)

A/B/C Consensus support: Bayesian PP (GTR/ Jones/ WAG)  
 x/y/z RAxML bootstrap (GTR/ JTT/ WAG)

### Fig. S17. Consensus tree of PESC glutamyl-tRNA synthetase sequences.

This tree shows the Bayesian consensus topology inferred for a 40 taxa x 433 aa alignment corresponding to glutamyl-tRNA sequences from across the tree of life. Ochrophyte sequences are shaded by predicted subcellular localisation, and all remaining sequences are shade by taxonomy. Two *Paraphysomonas* sequences are identified: an experimentally verified mitochondria-targeted protein, which groups with dual plastid/ mitochondria-targeted isoforms from other PESC clade members; and a putative cytoplasmic version, which groups with other ochrophyte cytoplasmic enzymes.



Ochrophyte cytoplasm

Ochrophyte dual

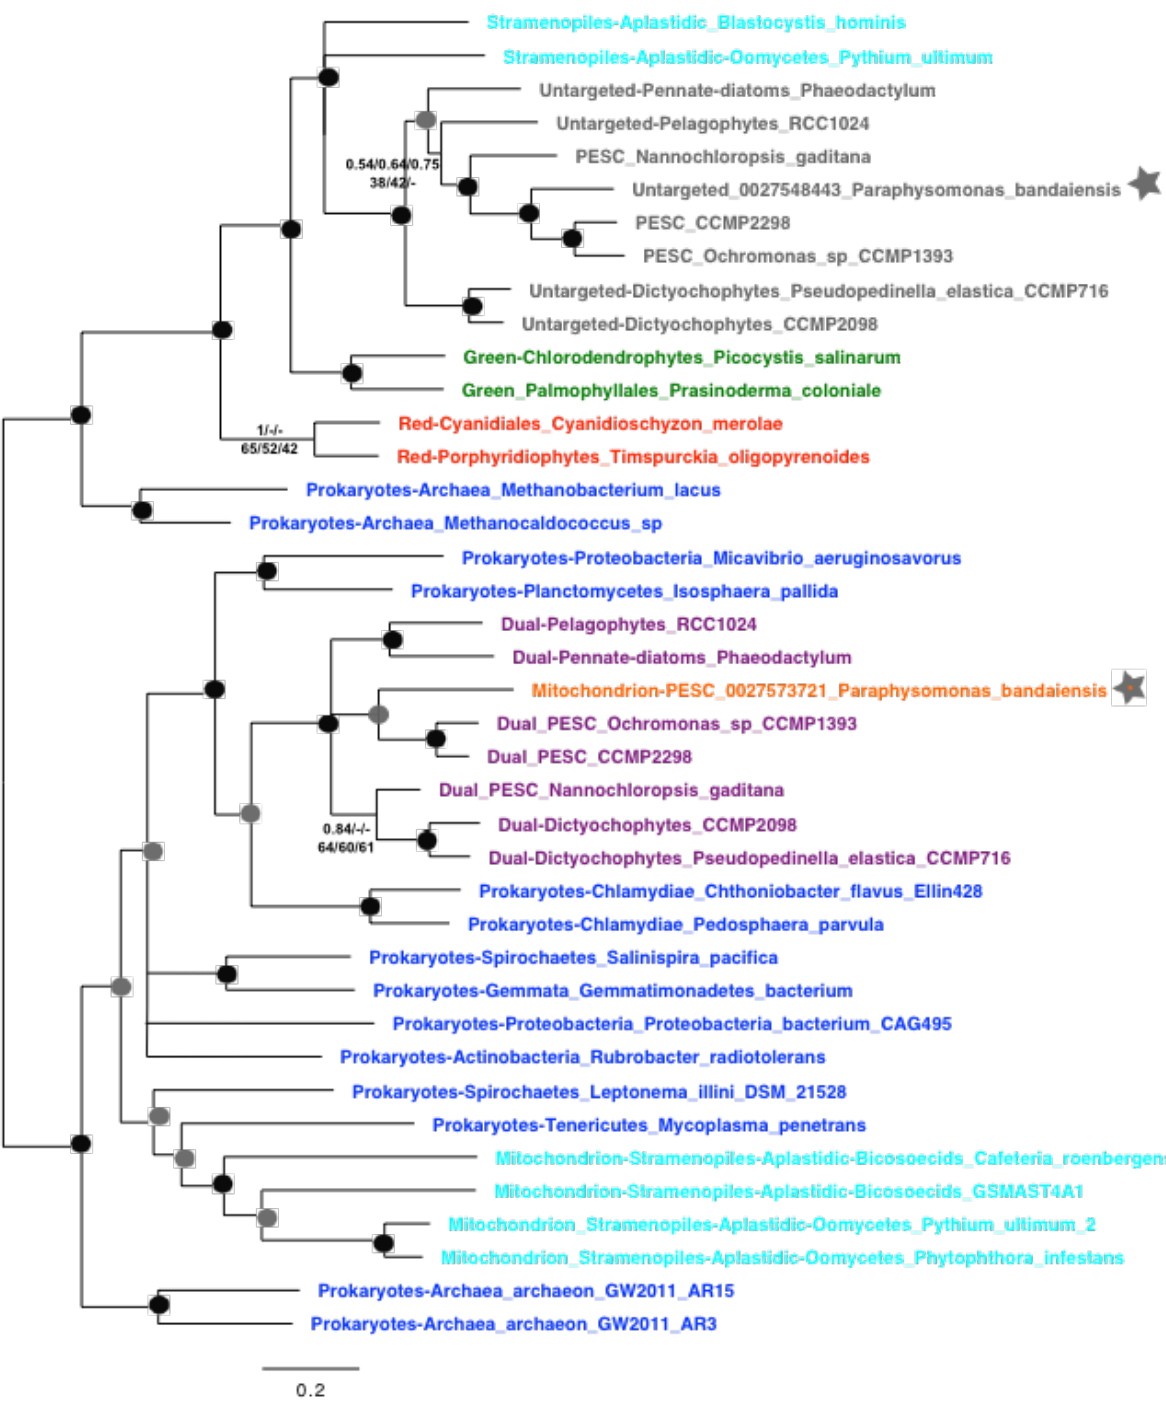

**Key**

- Ochrophyte mitochondria-targeted protein
- Ochrophyte dual plastid/ mitochondria-targeted protein
- Ochrophyte cytoplasmic/ untargeted protein
- Red algae
- Green algae
- Prokaryote
- Plastid-lacking SAR clade member

★ Plastid-derived protein retained in *Paraphysomonas* sp.

- Node with strong support (Bayesian PP = 1.0, and RAxML best tree bootstrap support > 80% in all alignments tested)
- Node with moderate support (Bayesian PP > 0.8, or RAxML best tree bootstrap support > 50% in 2/3 alignments tested)

A/B/C Consensus support: Bayesian PP (GTR/ Jones/ WAG)  
x/y/z RAxML bootstrap (GTR/ JTT/ WAG)

**Fig. S18. Consensus tree of PESC glycyI-tRNA synthetase sequences.**

This tree shows the Bayesian consensus topology inferred for a 40 taxa x 410 aa alignment corresponding to glycyI-tRNA synthetase sequences from across the tree of life, shown as per fig. S17.

**A)**

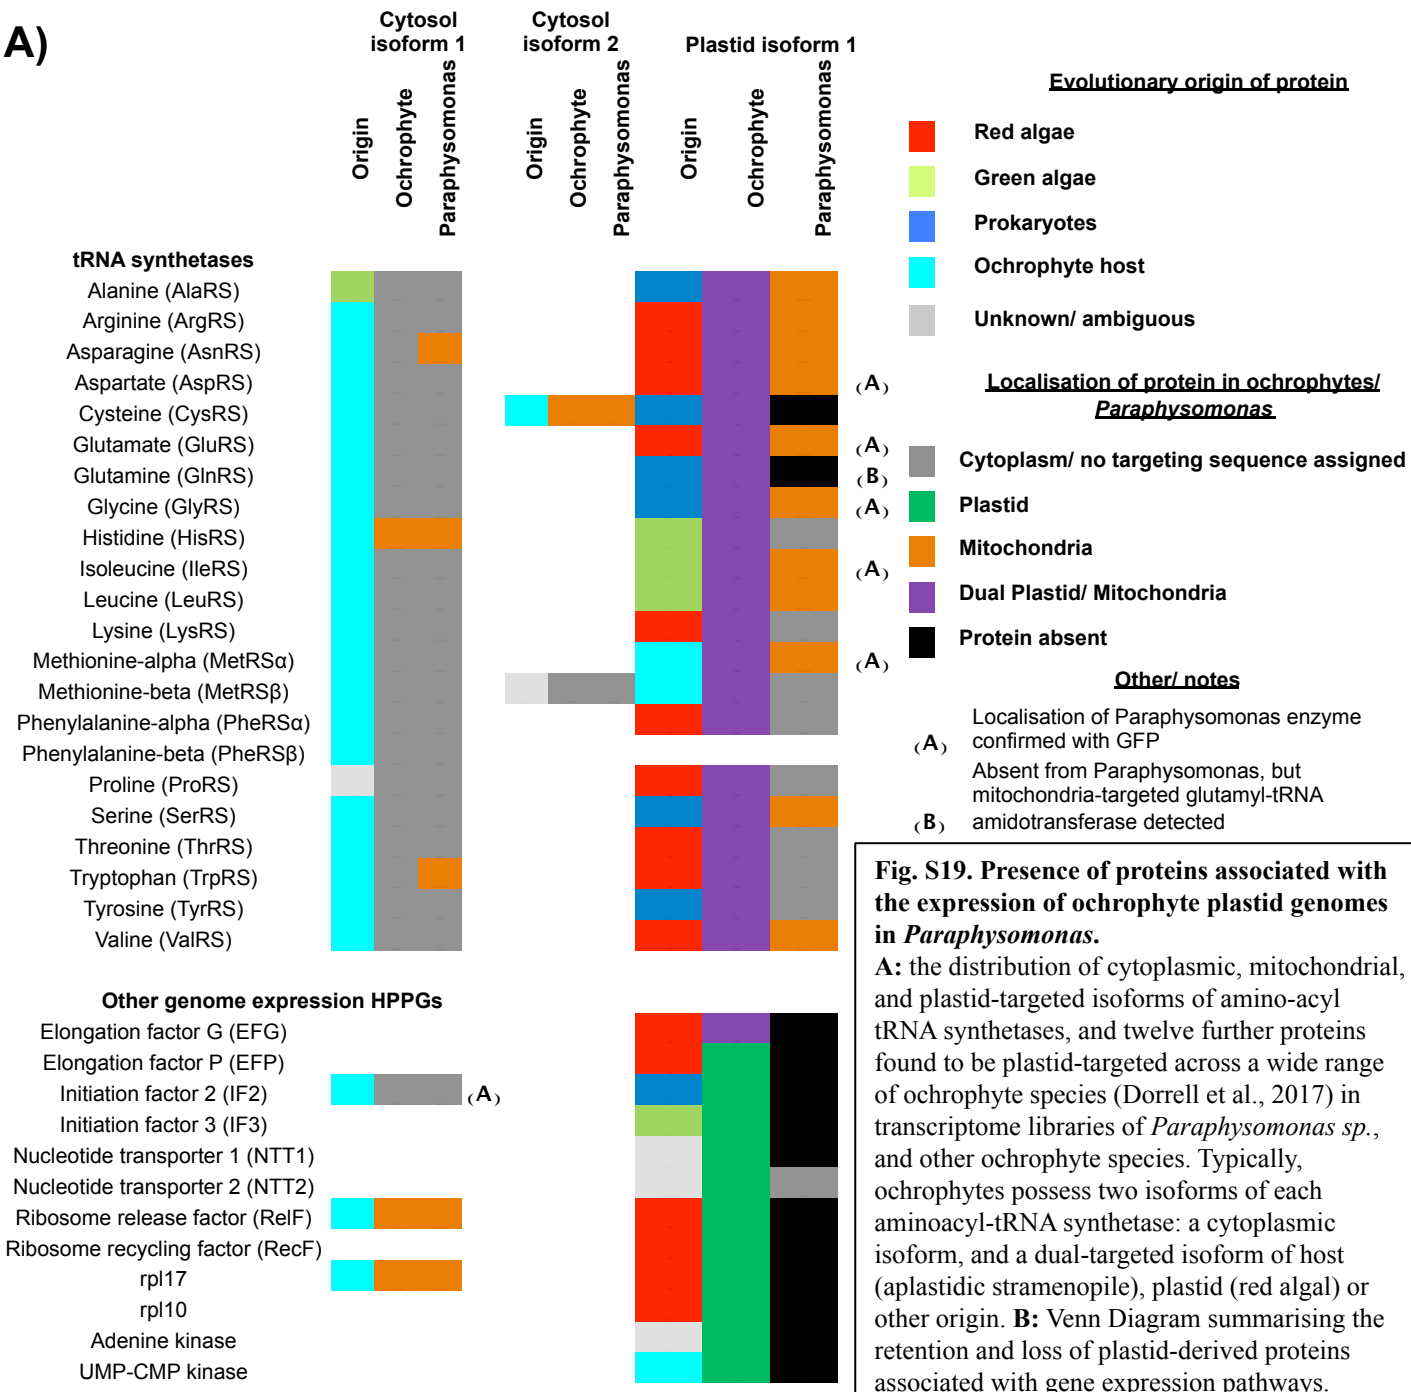

**Fig. S19. Presence of proteins associated with the expression of ochrophyte plastid genomes in *Paraphysomonas*.**

**A:** the distribution of cytoplasmic, mitochondrial, and plastid-targeted isoforms of amino-acyl tRNA synthetases, and twelve further proteins found to be plastid-targeted across a wide range of ochrophyte species (Dorrell et al., 2017) in transcriptome libraries of *Paraphysomonas sp.*, and other ochrophyte species. Typically, ochrophytes possess two isoforms of each aminoacyl-tRNA synthetase: a cytoplasmic isoform, and a dual-targeted isoform of host (aplasmidic stramenopile), plastid (red algal) or other origin. **B:** Venn Diagram summarising the retention and loss of plastid-derived proteins associated with gene expression pathways. *Paraphysomonas* retains the overwhelming majority of the ancestrally dual-targeted proteins, and in many cases the *Paraphysomonas* isoforms are inferred to possess uniquely mitochondrial targeting sequences. The only exceptions to this rule are cysteinyl-tRNA synthetase, for which *Paraphysomonas* retains an enzyme of solely mitochondrial origin, and glutamyl-tRNA synthetase, for which *Paraphysomonas* instead apparently uses a mitochondria-targeted glutamyl-tRNA transaminase (Gile et al., 2015). For almost all of the other studied proteins, the ochrophytes apparently possess separate mitochondria- and plastid-targeted isoforms, the latter of which are unilaterally not detected in *Paraphysomonas* transcriptomes.

**B)**

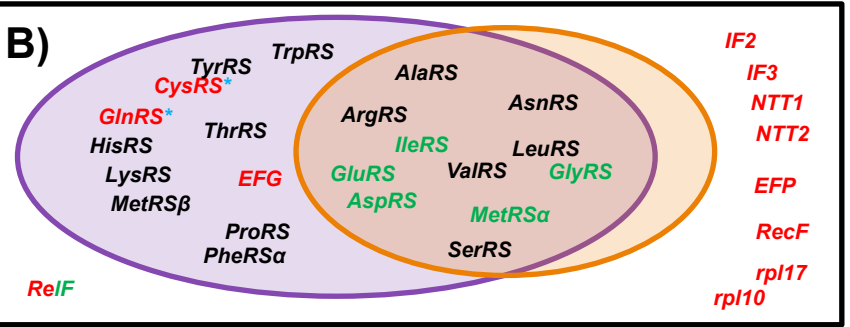

**Ochrophyte plastid protein dual-targeted to mitochondria**

**Paraphysomonas retains mitochondria-targeted copy of plastid-targeted protein**

**Protein Paraphysomonas has lost plastid-targeted protein**

**Protein Localisation of protein confirmed with GFP**

**Protein\* Mitochondria-targeted protein of cytoplasmic origin**

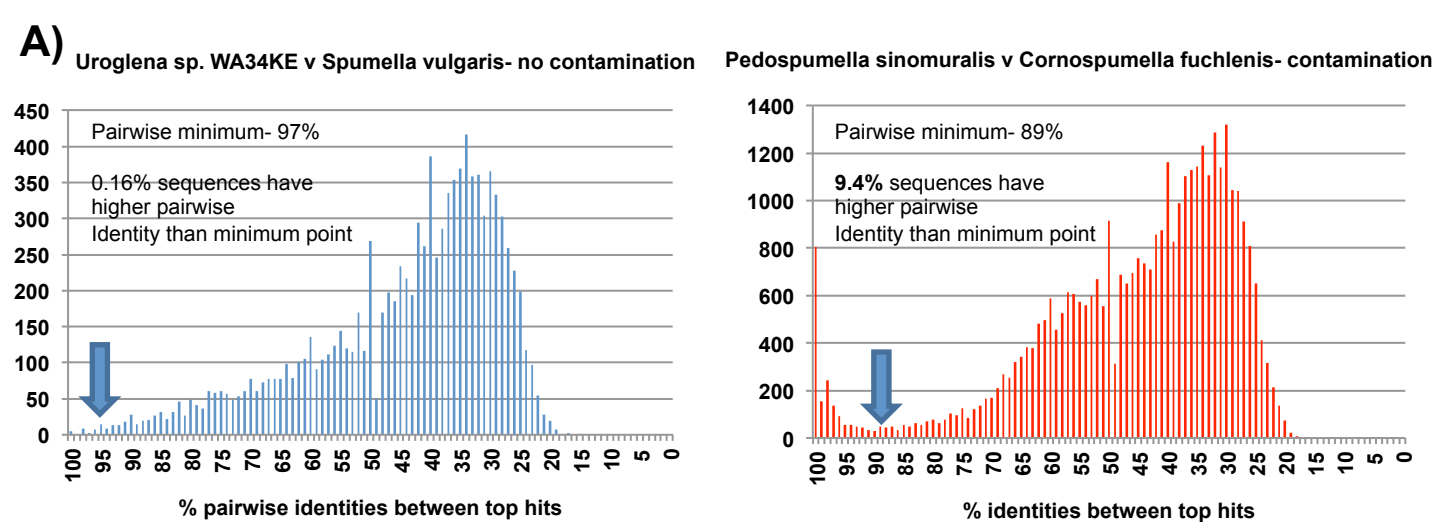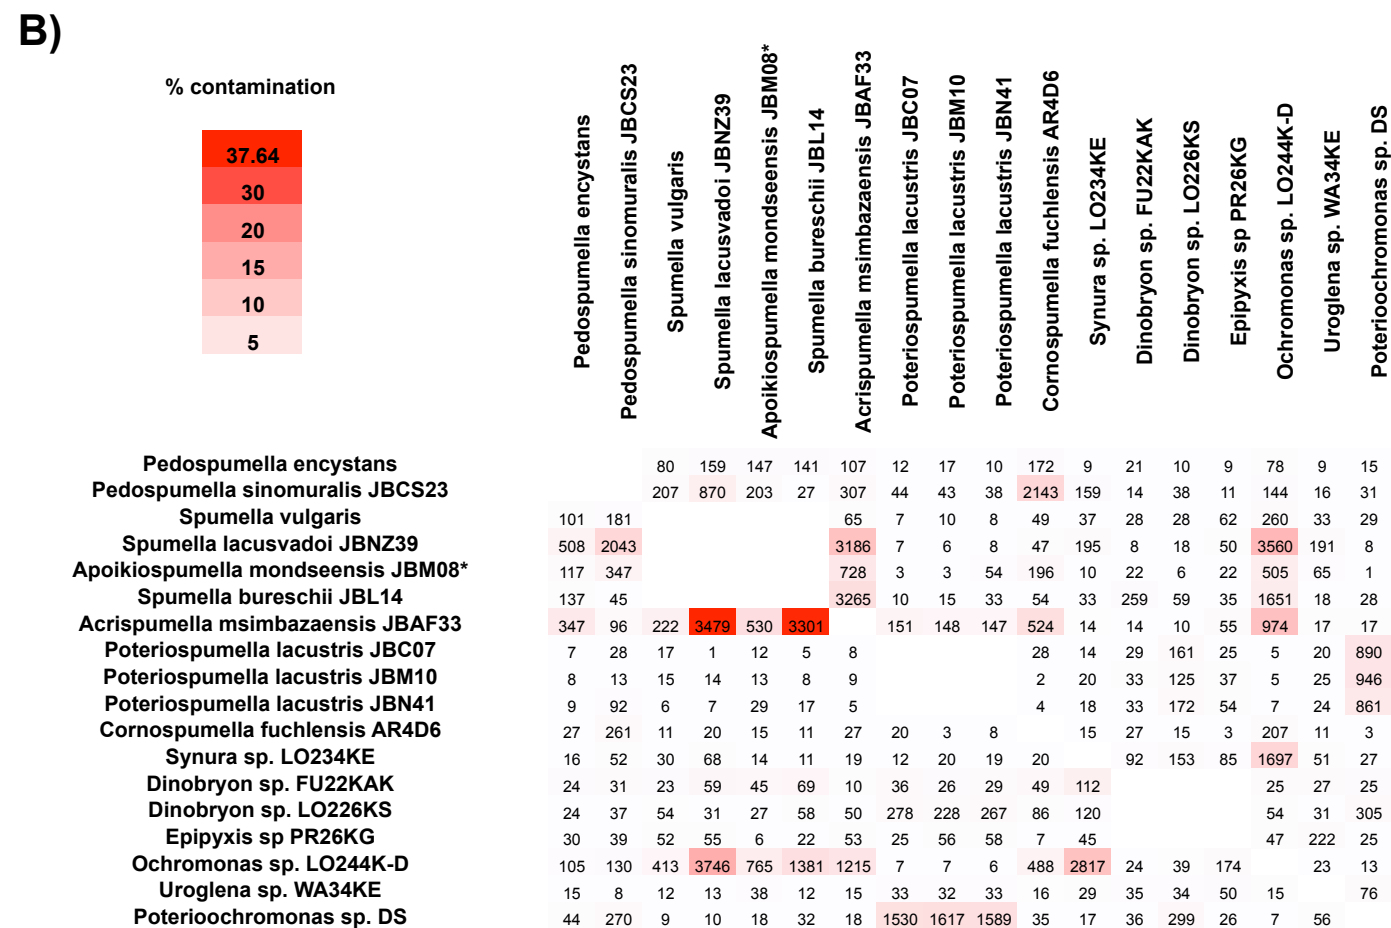

**Fig. S20. Contamination in published chrysophyte transcriptomes.**

**A:** exemplar BLAST top hit frequency distribution plots obtained for two published chrysophyte transcriptomes with no apparent reciprocal contamination (left), and two with contamination (right; Text S1A). **B:** heatmap showing the number (values) and percentage (shaded intensity) of transcripts in libraries reported in Beisser et al., 2017; inferred to be potential contaminants, using the BLAST approach. Each cell shows the number of transcripts in the row species identified to be potential contaminants when searched against the column species library. *Apoikiospumella mondseensis JBM08* is asterisked as the transcriptome identified with this name was found (by 18S analysis) to in fact correspond to a second isolate of *Spumella lacusvadoi JBNZ39*.

**A)** Ability of modified HECTAR chloroplast targeting thresholds to localise experimentally verified controls

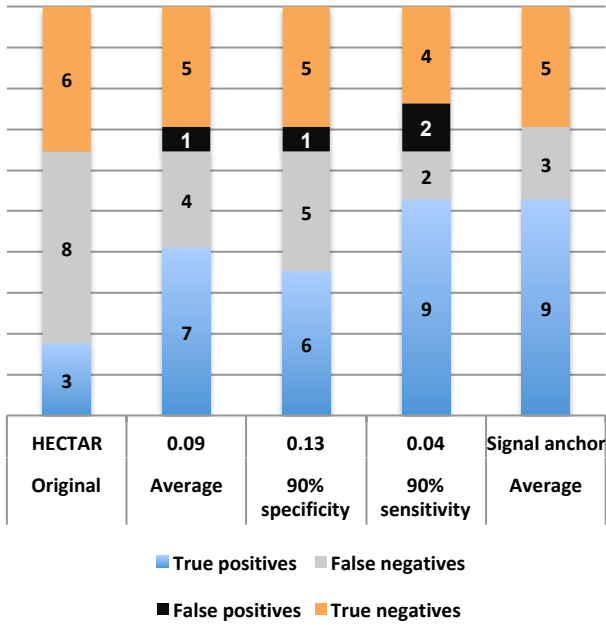

**B)** Ability of modified HECTAR chloroplast targeting thresholds to localise phylogenetically verified *Spumella* sp. NIES-1468 plastid proteins

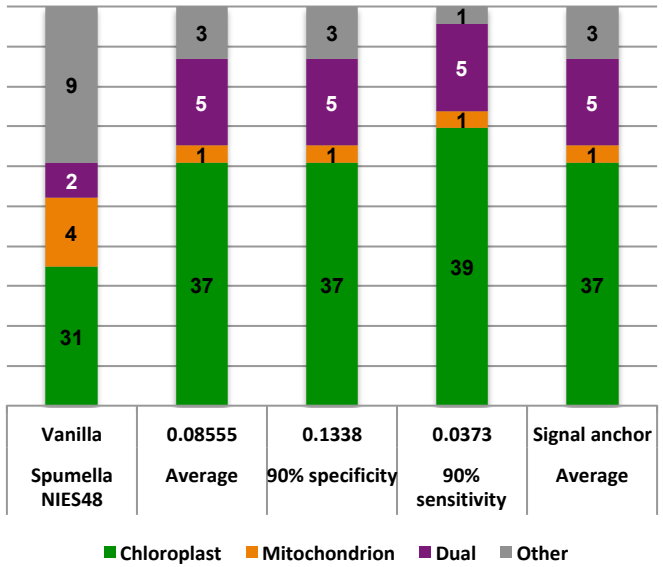

**Fig. S21. Custom targeting thresholds for inspecting PESC clade transcriptomes.**

**A:** the number of experimentally verified chrysophyte and eustigmatophyte proteins identified to possess plastid-targeting peptides under default chloroplast score conditions; the average between 90% specificity and sensitivity chloroplast score values; 90% specificity chloroplast score; 90% sensitivity chloroplast score ; and the selected condition of the average between 90% specificity and sensitivity chloroplast score values, with an additional stipulation that the chloroplast score be greater than the signal anchor score calculated. **B:** the targeting predictions made by each threshold for a validation dataset of 48 proteins identified from the « *Spumella* » sp. *NIES1846* transcriptome to resolve with other PESC clade plastid proteins.

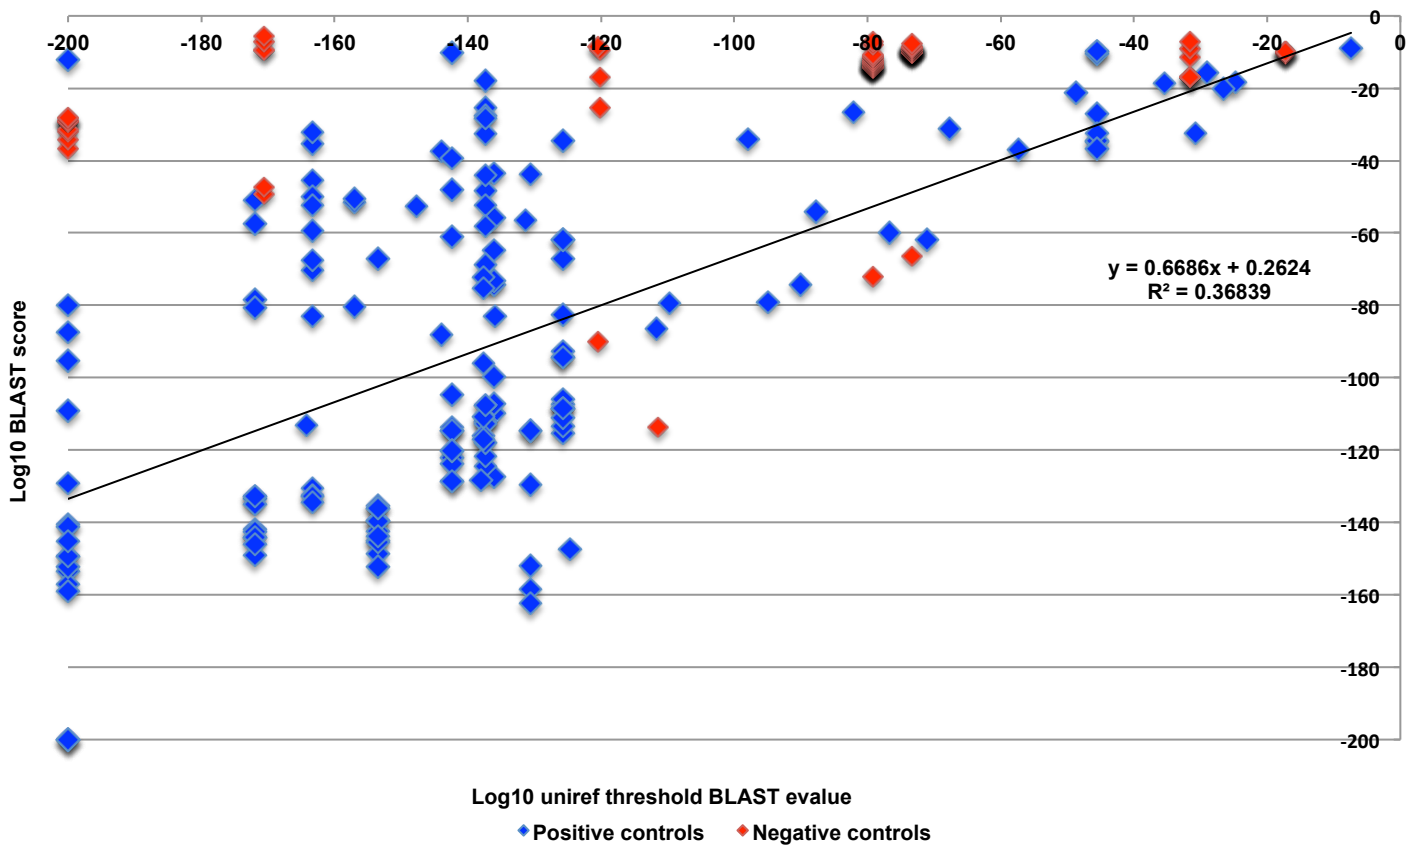

**Fig. S22. Floating evaluate thresholds for BLAST identification of plastid protein homologues in PESC clade libraires.**  
 This figure shows a scatterplot of (horizontal) the BLAST values obtained when a subset of the 9531 query proteins conserved across ochrophyte lineages are searched against a modified uniref library, excluding all taxa with a suspected history of serial endosymbiosis; and (vertical) a selected dataset of phylogenetically verified positive control proteins (consisting of proteins inferred to resolve with other ochrophyte plastid orthologues) and negative controls (proteins corresponding to mitochondrial and cytoplasmic homologues of plastid-targeted and/ or plastid-encoded proteins). To facilitate regression calculations, all zero values are shown as  $1 \times 10^{-200}$ . The best-fit line shows the best possible separation of the positive and negative control datasets: values below the line (i.e. the PESC clade evaluate is lower than the expected value from the regression against the uniref evaluate) are likely to be orthologues; values above the line show too weak homology for orthology to be confidently assigned.
